# Supplementary material for: Metal-free cycloaddition to synthesize naphtho[2,3-d][1,2,3]triazole-4,9-diones
Source: Royal Society of Chemistry journal article supplement (doi:10.1039/c5ob01322d), 2015-01-01
Supplement: c5ob01322d1.pdf [file c5ob01322d1.pdf]

**Supporting Information**

**Metal Free Cycloaddition to Synthesize  
Naphtho[2,3-d][1,2,3]triazole-4,9-diones**

Bing-Fan Chen,<sup>a</sup> Kung-Kai Kuo,<sup>b</sup> Jaya Kishore Vandavasi,<sup>a</sup> Chung-Yu Chen,<sup>a</sup> Siva  
Senthil Kumar Boominathan<sup>a</sup> and Jeh-Jeng Wang\*,<sup>a</sup>

<sup>a</sup>Department of Medicinal and Applied Chemistry, Kaohsiung Medical University,  
Kaohsiung, Taiwan.

<sup>b</sup>Department of Surgery, School of Medicine, Kaohsiung Medical University, Kaohsiung,  
Taiwan.

jjwang@kmu.edu.tw

## **Table of Contents**

|                                    |                 |
|------------------------------------|-----------------|
| <b>1. General Information.....</b> | <b>s3</b>       |
| <b>2. NMR data.....</b>            | <b>s4 - s41</b> |

## **1. General Information**

**Experimental Details:** All reagents and starting materials were obtained from commercial sources and used as received. All dry solvents were purified using a solvent purification system. All reactions were performed under an atmosphere of argon unless otherwise mentioned. Brine refers to a saturated solution of sodium chloride. Aluminum-backed plates precoated with silica gel 60F254 were used for thin layer chromatography and were visualized with a UV lamp. Melting points are uncorrected.  $^1\text{H}$  NMR and  $^{13}\text{C}$  NMR spectra were recorded in 400 MHz instrument using  $\text{CDCl}_3$  as a solvent.  $^1\text{H}$  NMR chemical shifts are referenced to TMS (0 ppm) or  $\text{CDCl}_3$  (7.26 ppm).  $^{13}\text{C}$  NMR was referenced to  $\text{CDCl}_3$  (77.0 ppm). Multiplicities were denoted as (s = singlet, d = doublet, t = triplet, q = quartet, m = multiplet or overlap of nonequivalent resonances, integration). Mass spectra and high resolution mass spectra (HRMS) were obtained by electron impact at 70 eV in an ion trap. Flash column chromatography was carried out over silica gel 60 (230-400 mesh).

NP-TMA

Pulse Sequence: s2pu1

Mercury-400BB "MercuryPlus400"

Date: Apr 7 2014

Solvent: CDCl<sub>3</sub>

Ambient temperature

Total 32 repetitions

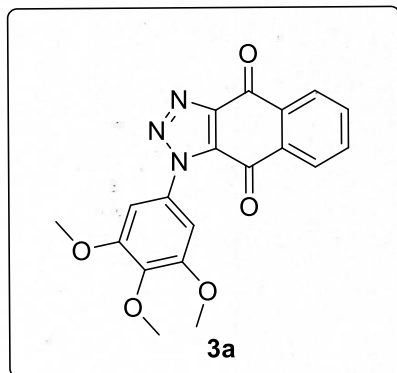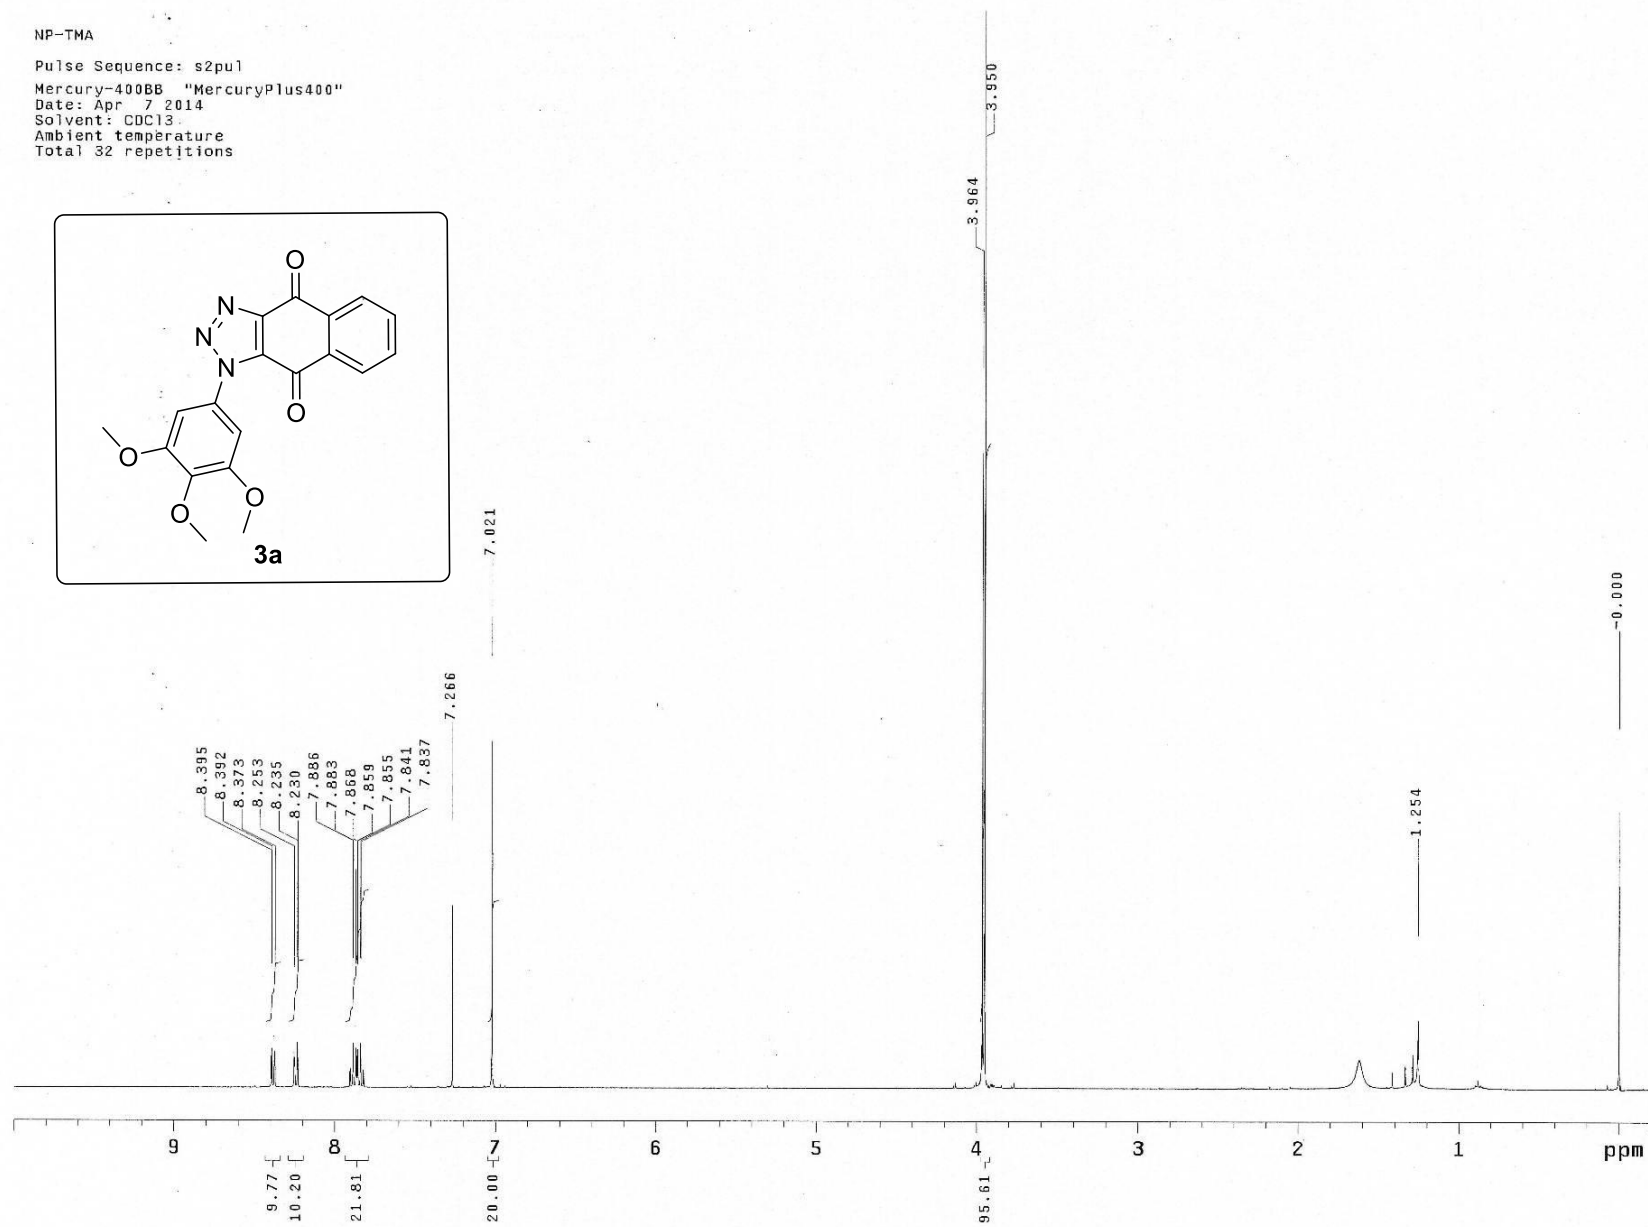

NP-TMA

Pulse Sequence: s2pu1

Mercury-400BB "MercuryPlus400"

Date: Apr 7 2014

Solvent: CDCl<sub>3</sub>

Ambient temperature

Total 5728 repetitions

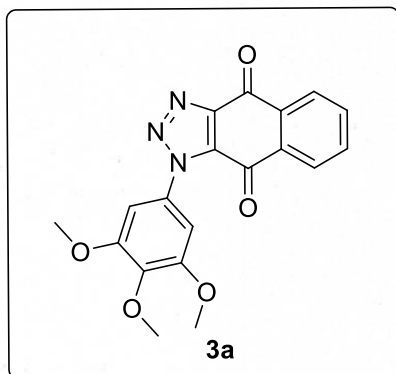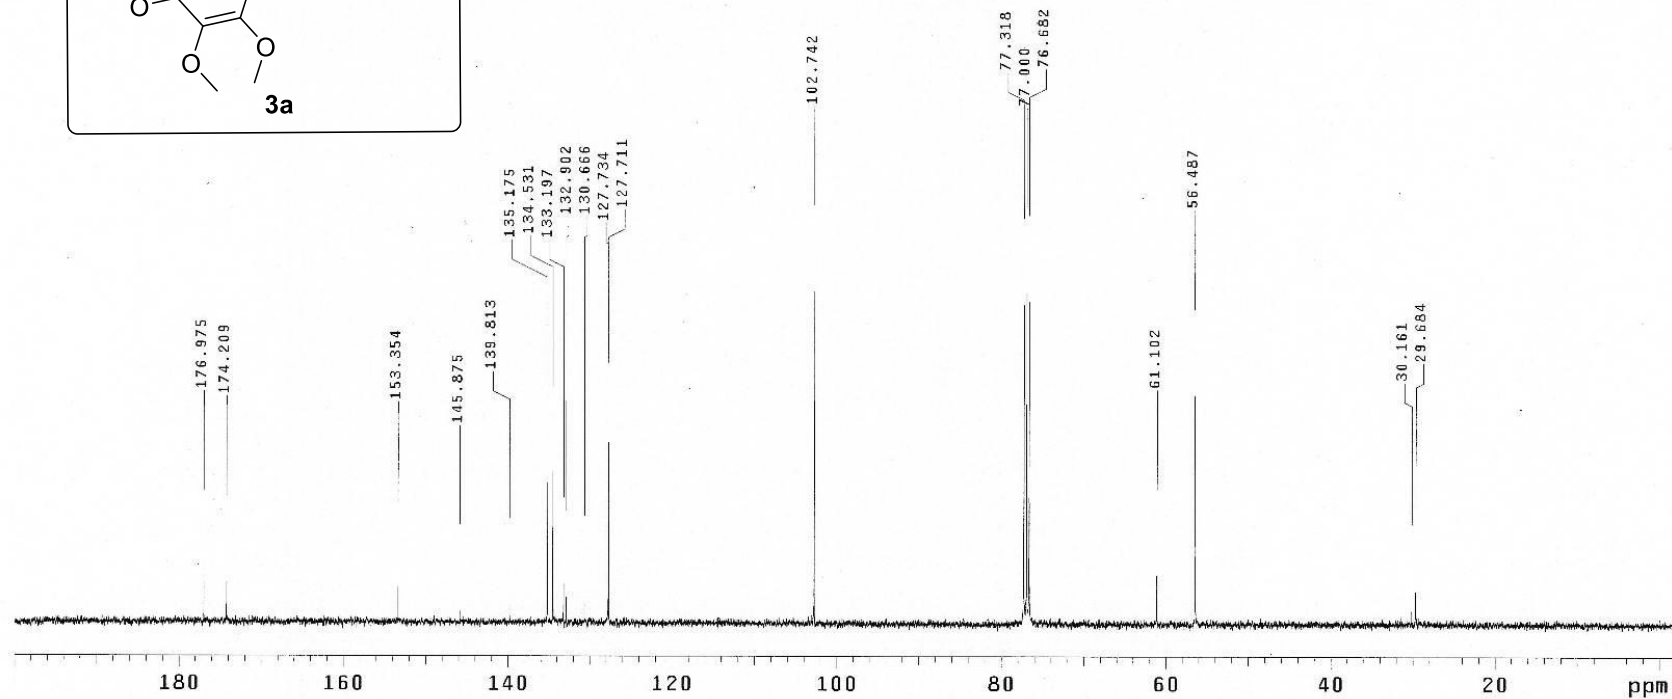

NP-4OMe

Pulse Sequence: s2pu1

Mercury-400BB "MercuryPlus400"

Date: Mar 26 2014

Solvent: CDCl<sub>3</sub>

Ambient temperature

Total 64 repetitions

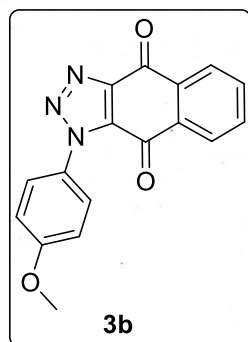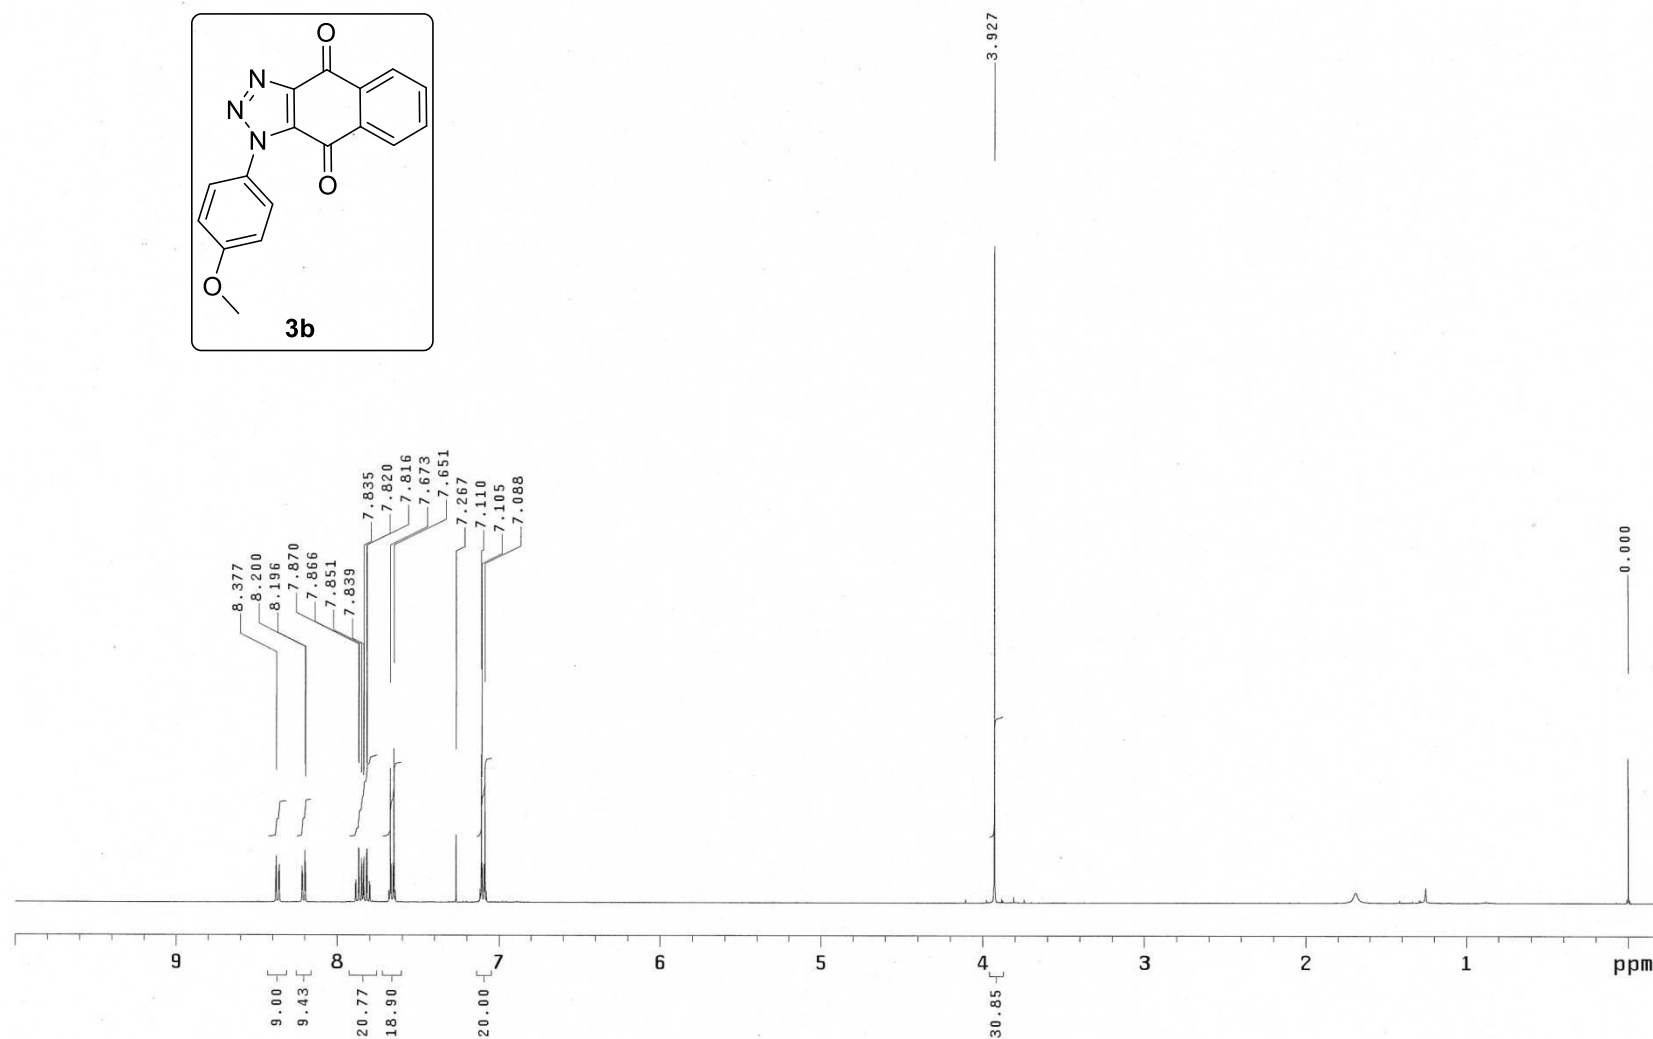

NP-40Me

Pulse Sequence: s2pu1

Mercury-400BB "MercuryPlus400"

Date: Mar 26 2014

Solvent: CDCl<sub>3</sub>

Ambient temperature

Total 4752 repetitions

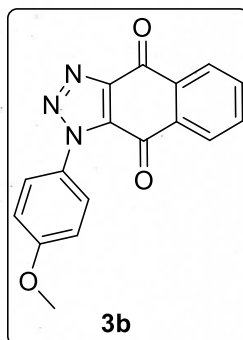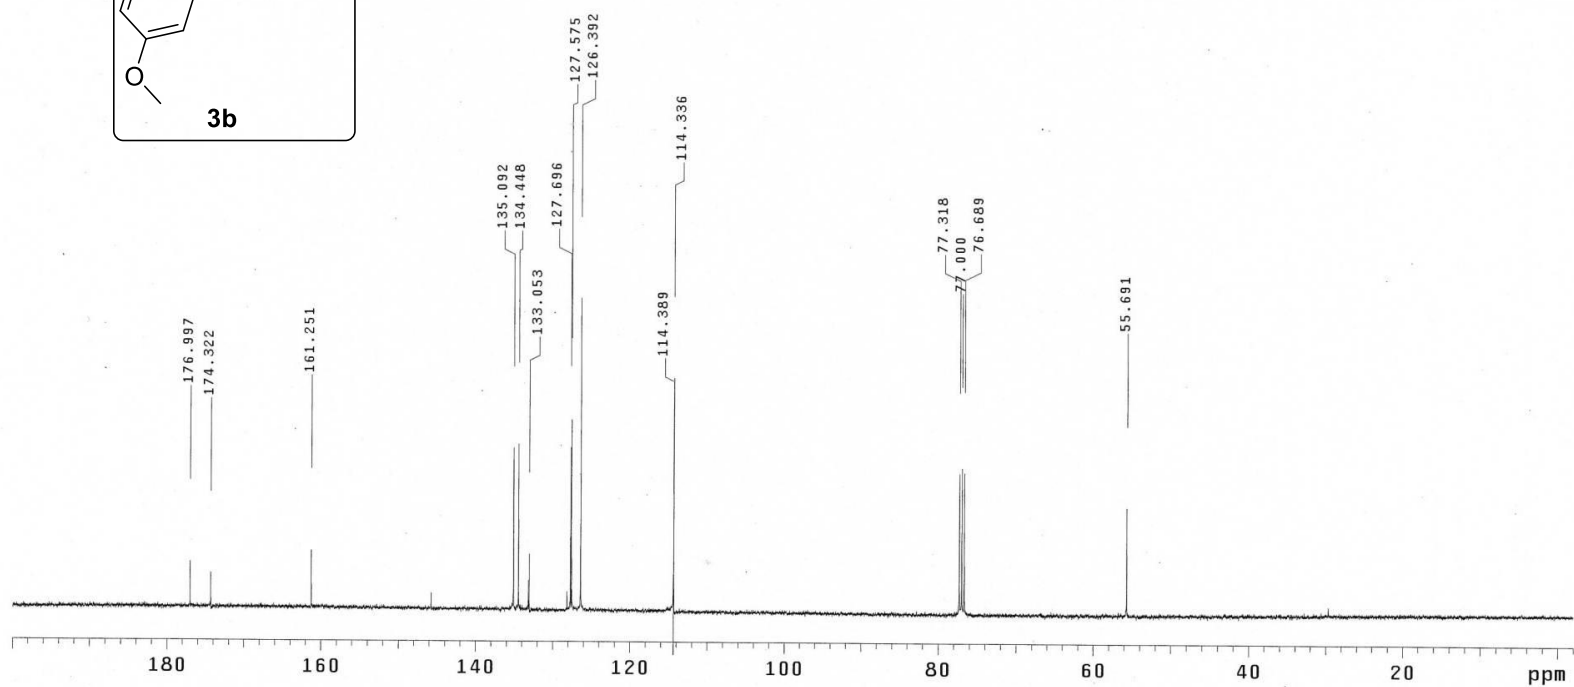

NP-3OMe

Pulse Sequence: s2pu1

Mercury-400BB "MercuryPlus400"

Date: Apr 9 2014

Solvent: CDCl3

Ambient temperature

Total 64 repetitions

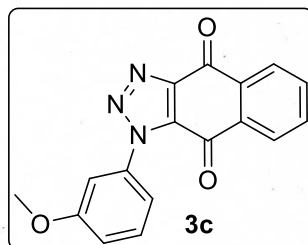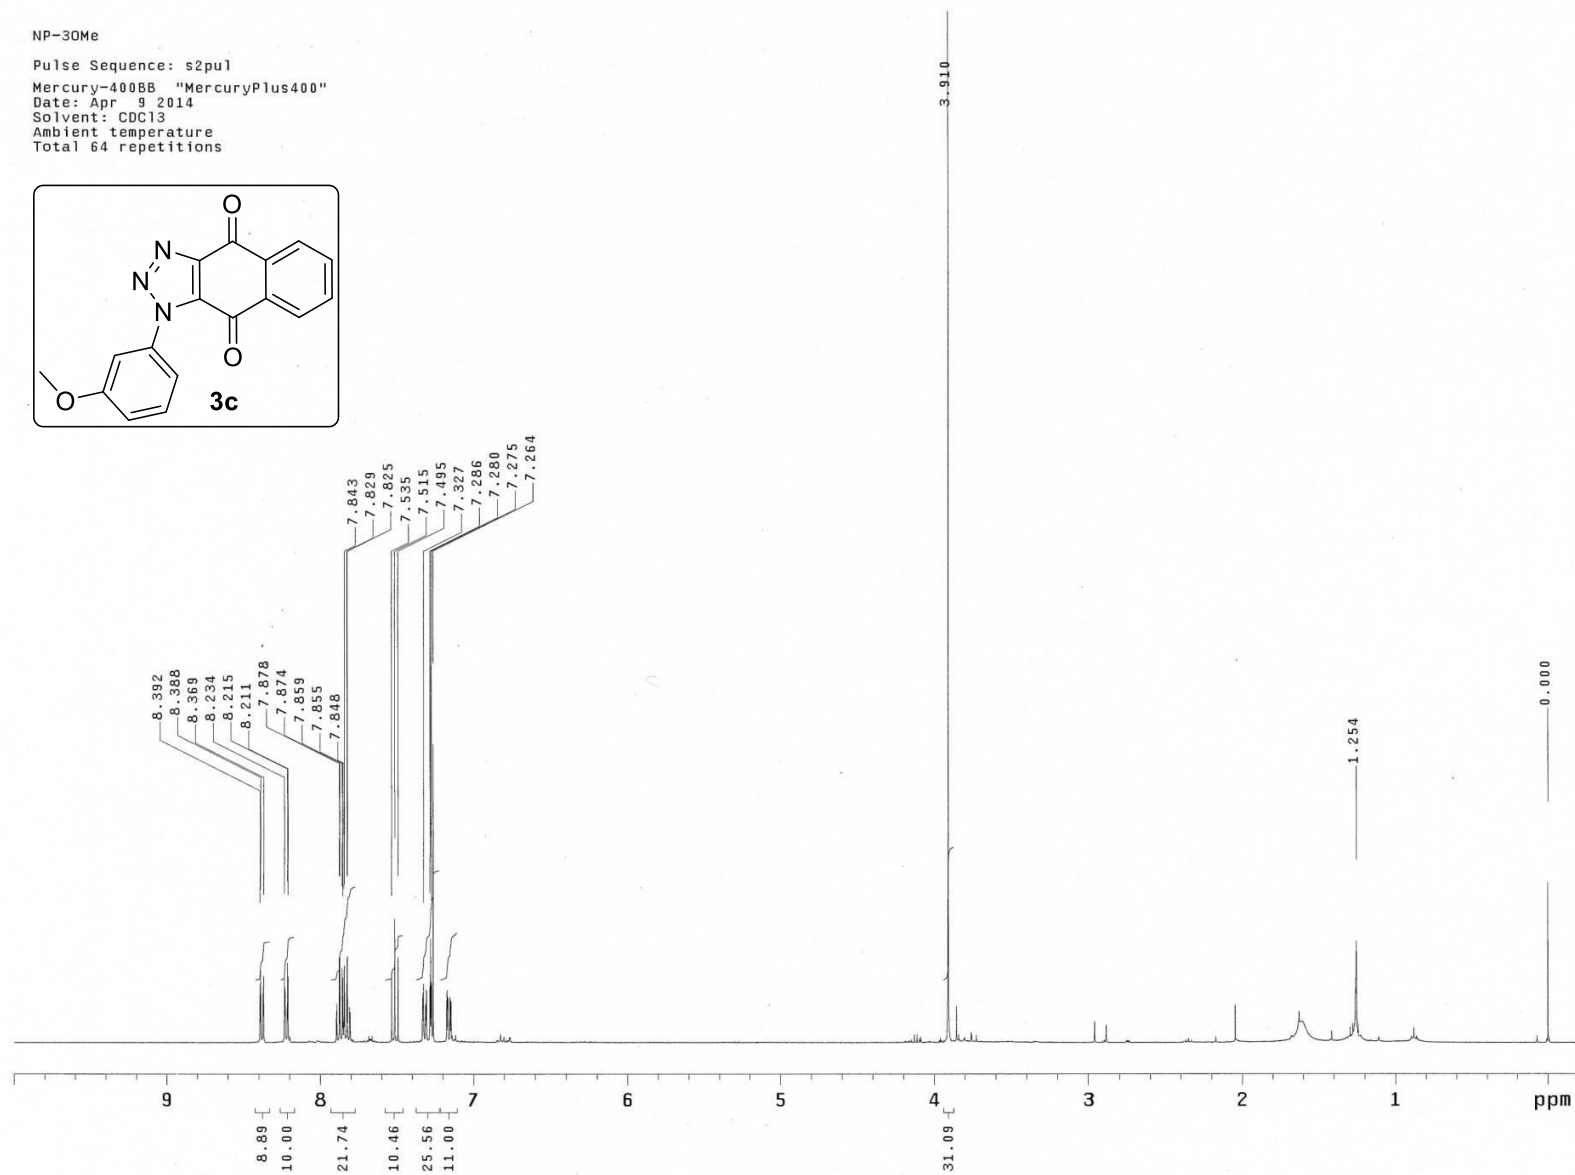

NP-30Me

Pulse Sequence: s2pu1

Mercury-400BB "MercuryPlus400"

Date: Apr 9 2014

Solvent: CDCl<sub>3</sub>

Ambient temperature

Total 64000 repetitions

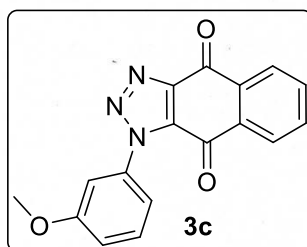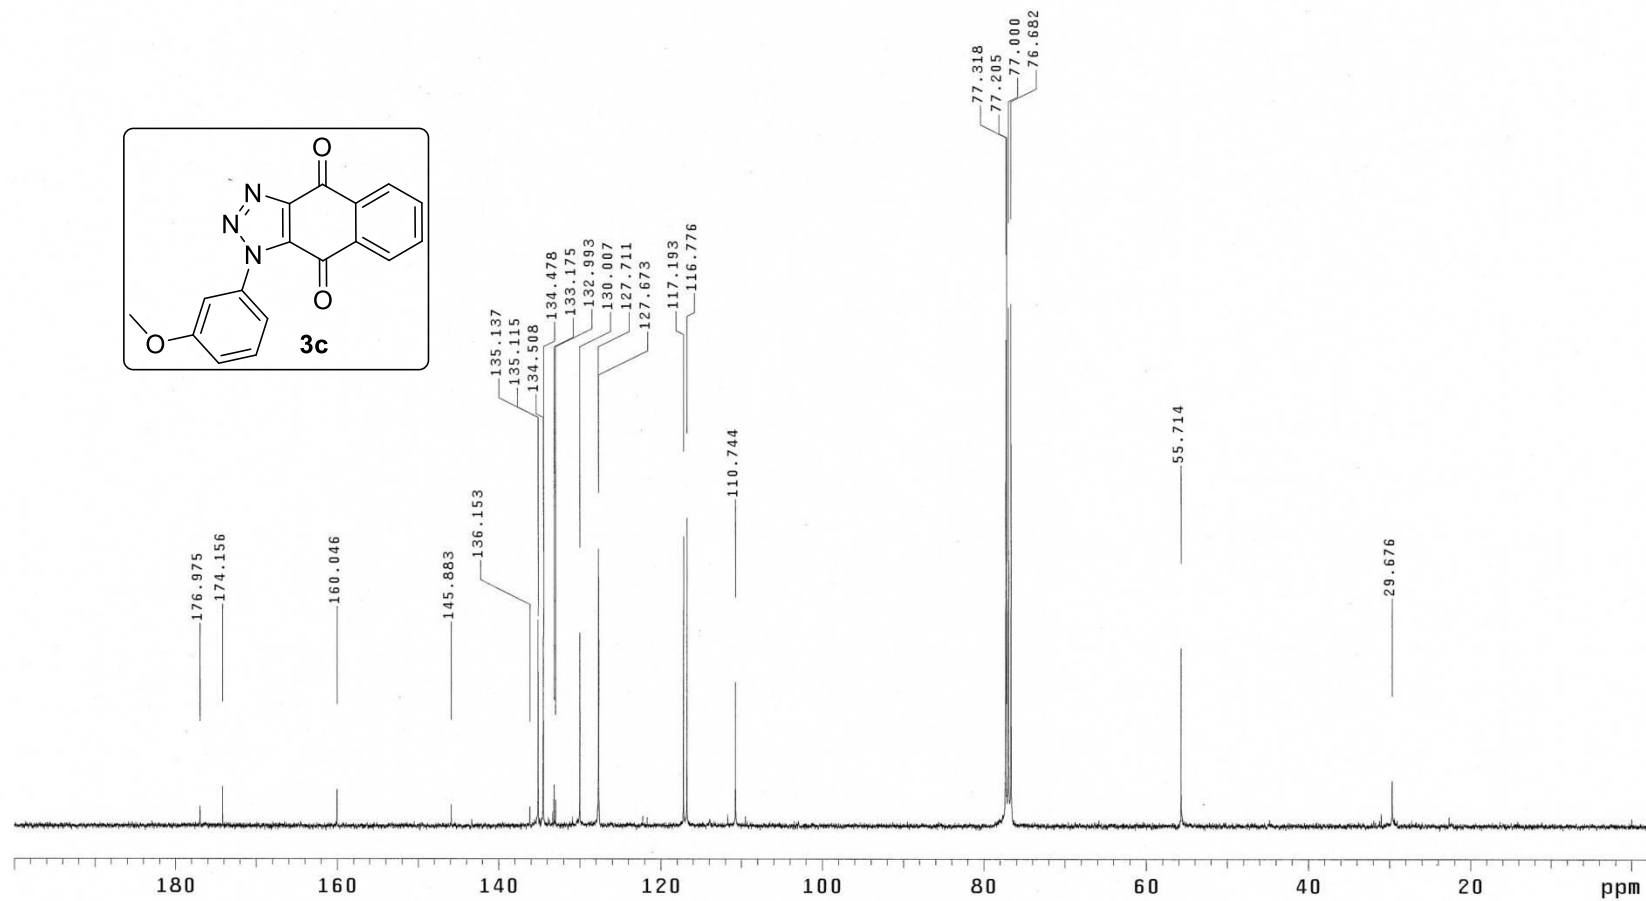

NP-20Me

Pulse Sequence: s2pu1

Mercury-400BB "MercuryPlus400"

Date: Mar 26 2014

Solvent: CDCl<sub>3</sub>

Ambient temperature

Total 64 repetitions

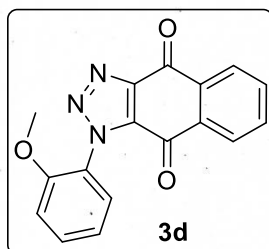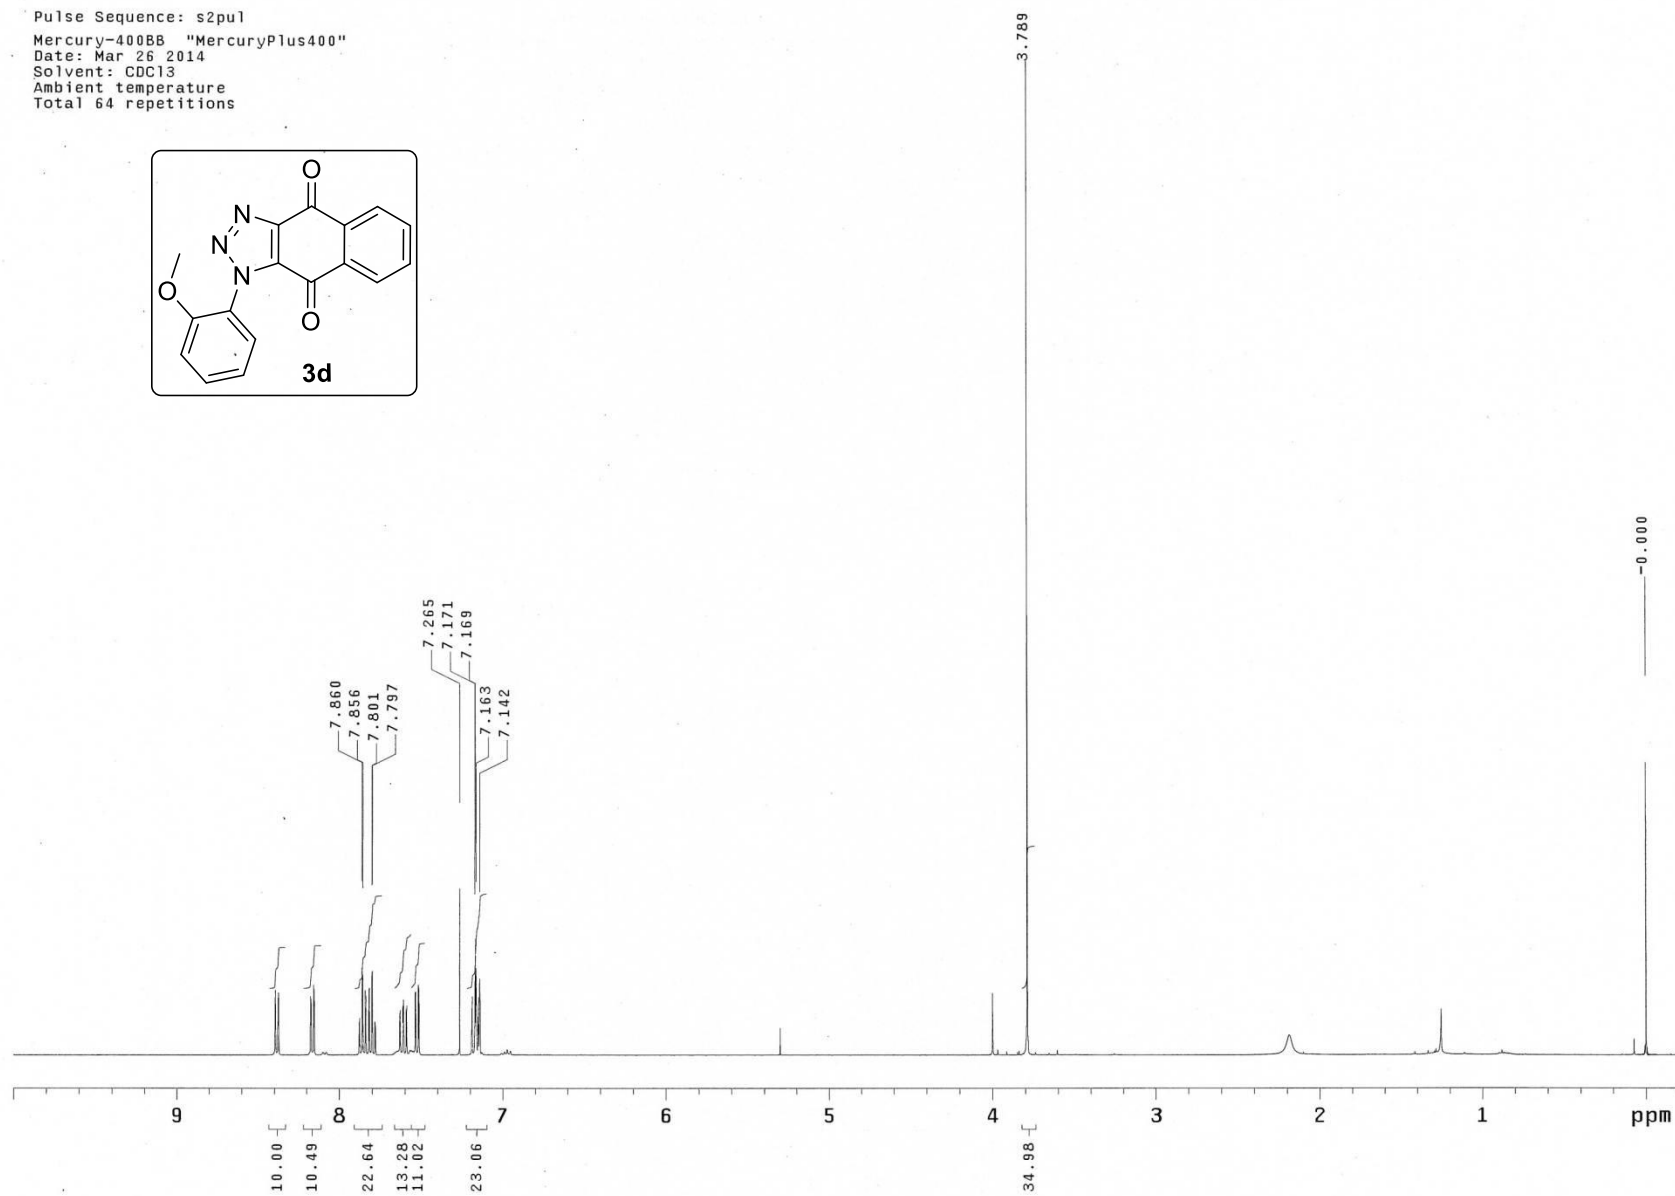

NP-4Me

Pulse Sequence: s2pu1

Mercury-400BB "MercuryPlus400"

Date: Apr 7 2014

Solvent: CDCl<sub>3</sub>

Ambient temperature

Total 32 repetitions

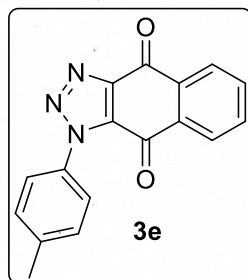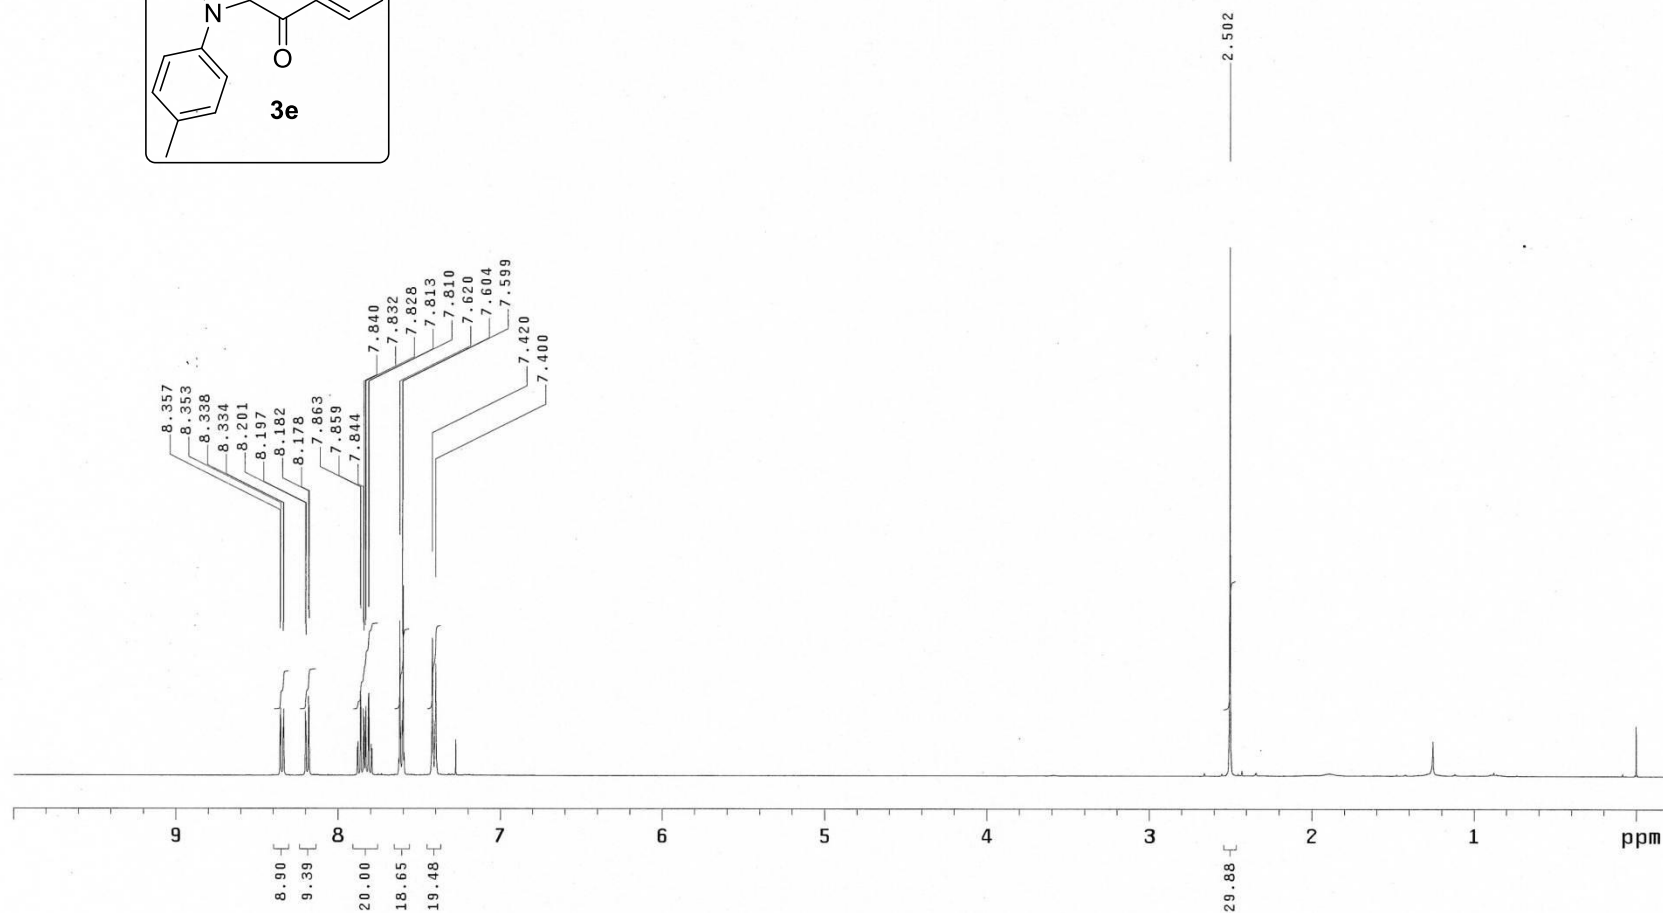

NP-4Me

Pulse Sequence: s2pu1

Mercury-400BB "MercuryPlus400"

Date: Apr 7 2014

Solvent: CDCl<sub>3</sub>

Ambient temperature

Total 480 repetitions

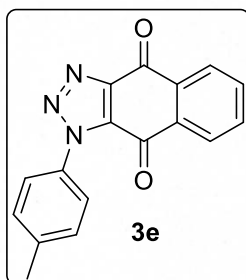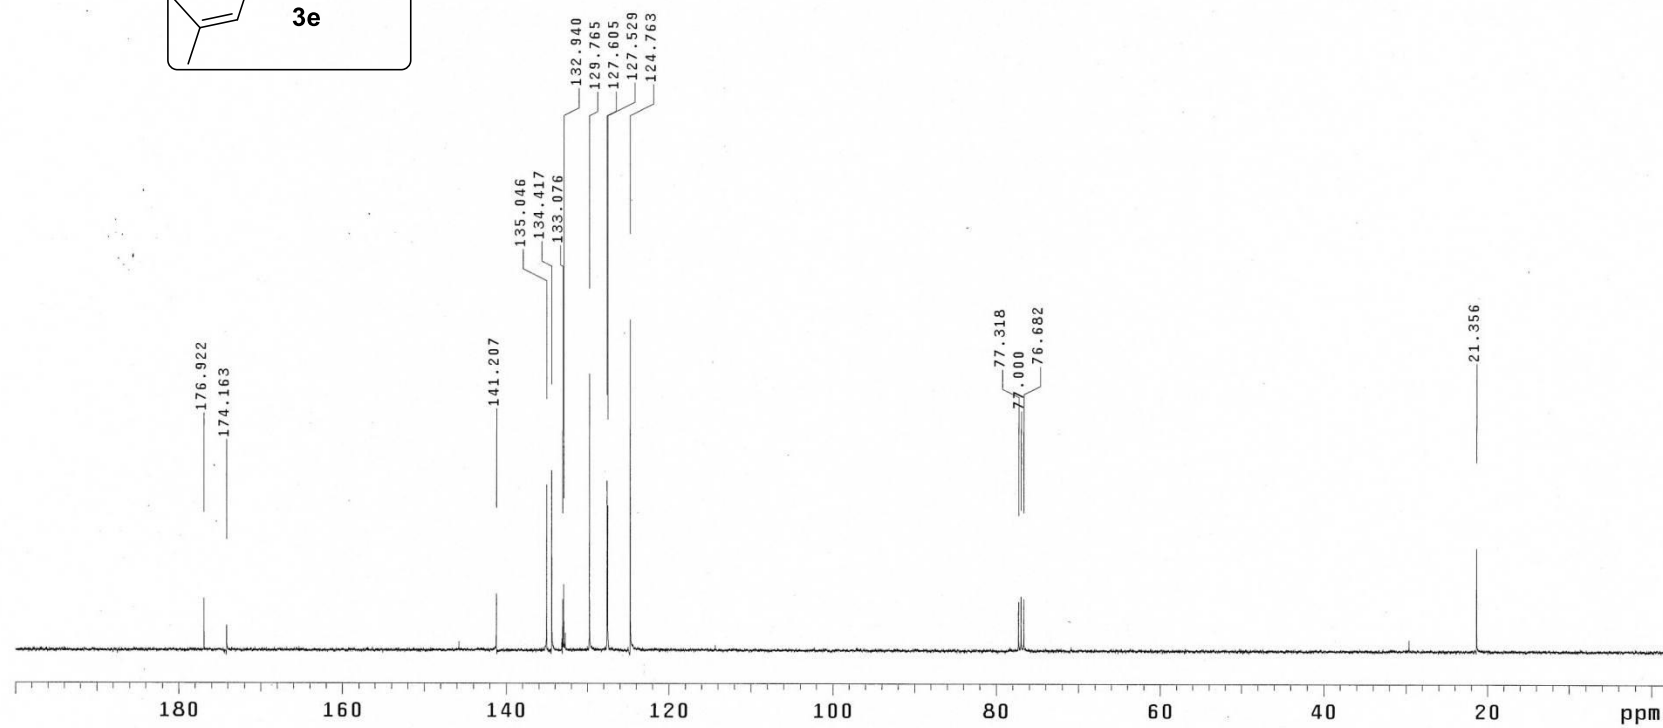

NP-Ph

Pulse Sequence: s2pu1

Mercury-400BB "MercuryPlus400"

Date: Mar 26 2014

Solvent: CDCl<sub>3</sub>

Ambient temperature

Total 64 repetitions

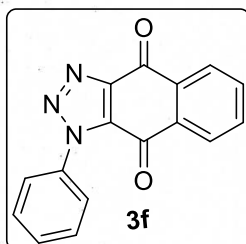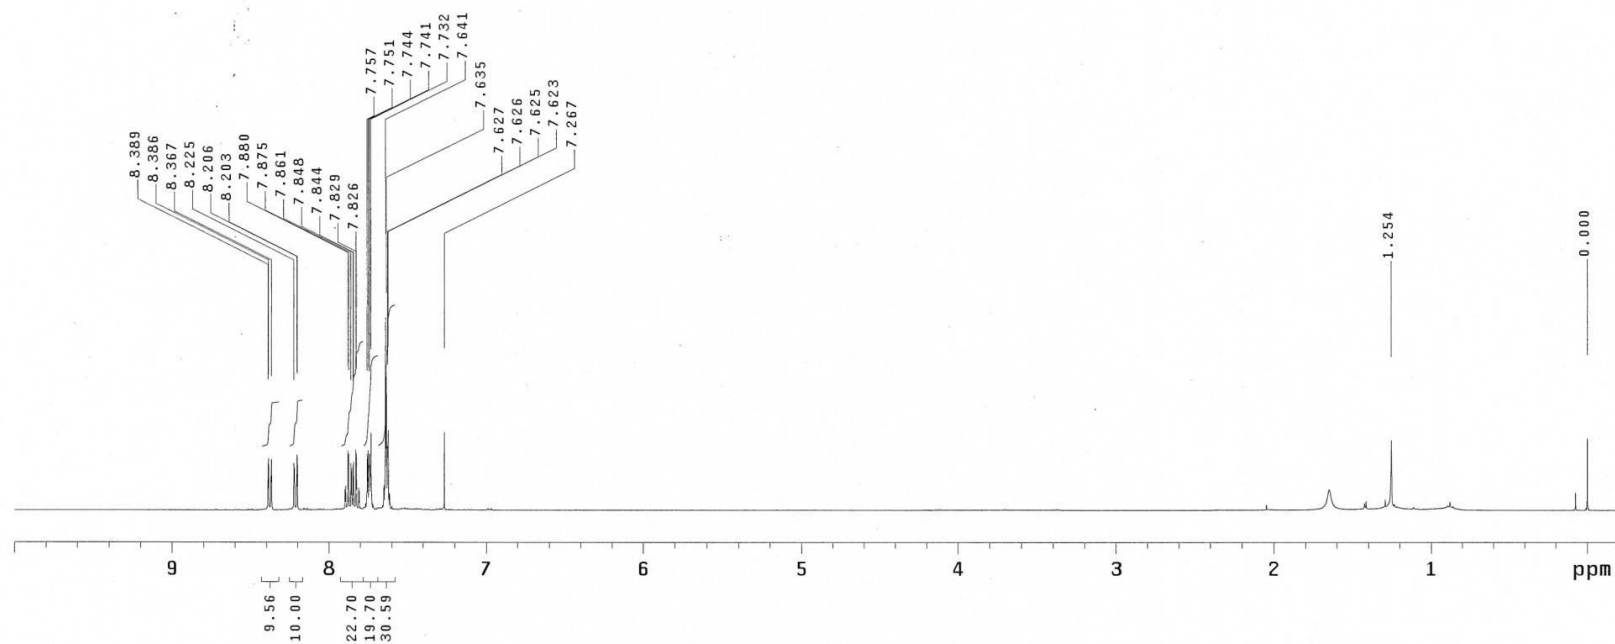

NP-Ph

Pulse Sequence: s2pu1

Mercury-400BB "MercuryPlus400"

Date: Mar 26 2014

Solvent: CDCl<sub>3</sub>

Ambient temperature

Total 7200 repetitions

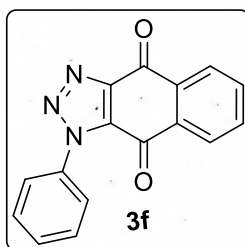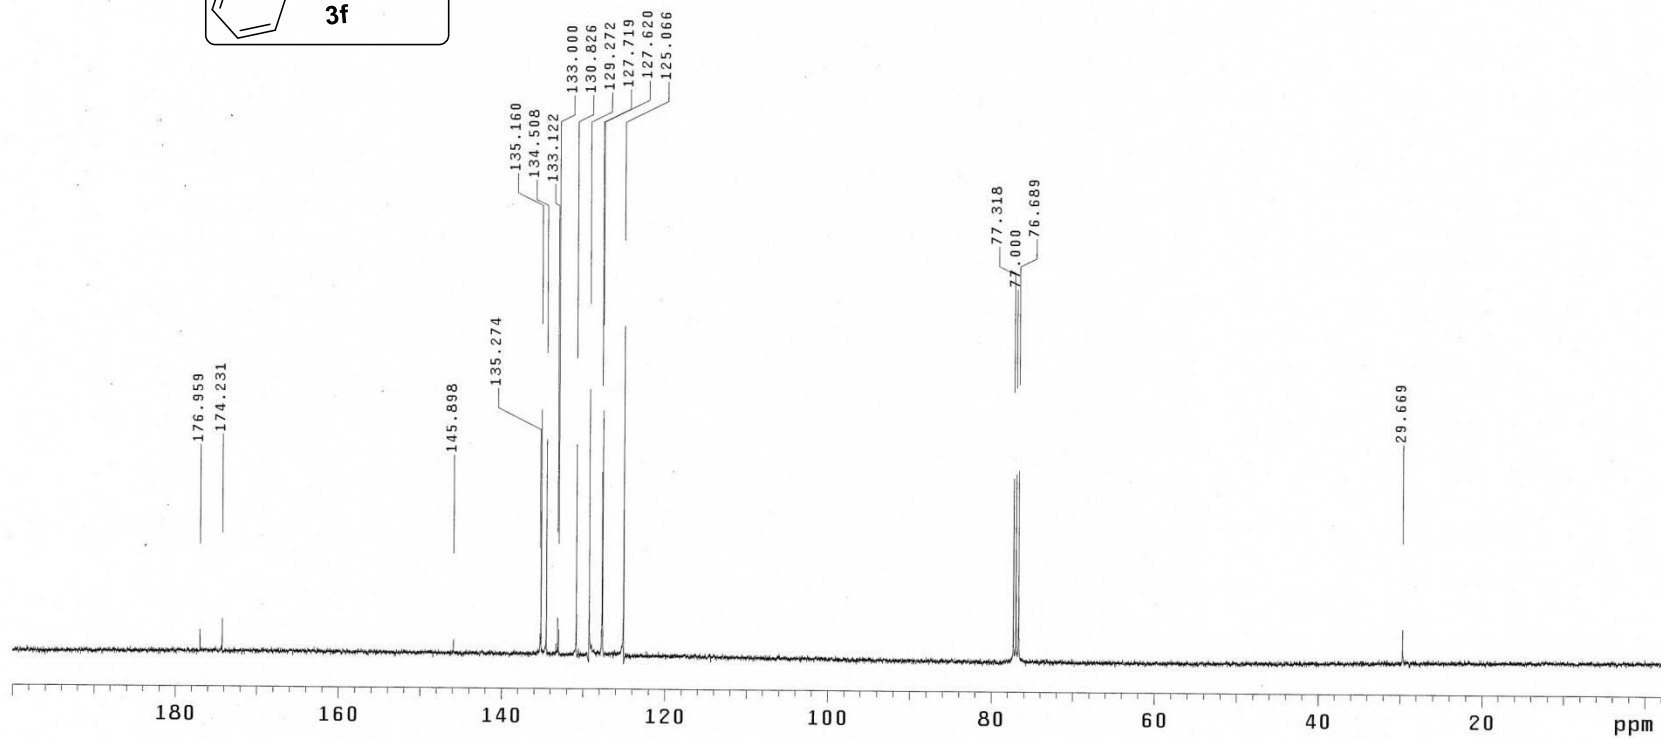

NP-4F

Pulse Sequence: s2pu1  
Mercury-400BB "MercuryPlus400"  
Date: Mar 26 2014  
Solvent: CDCl3  
Ambient temperature  
Total 80 repetitions

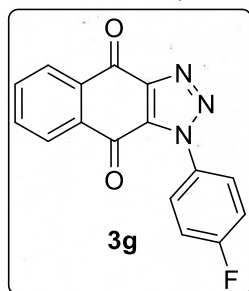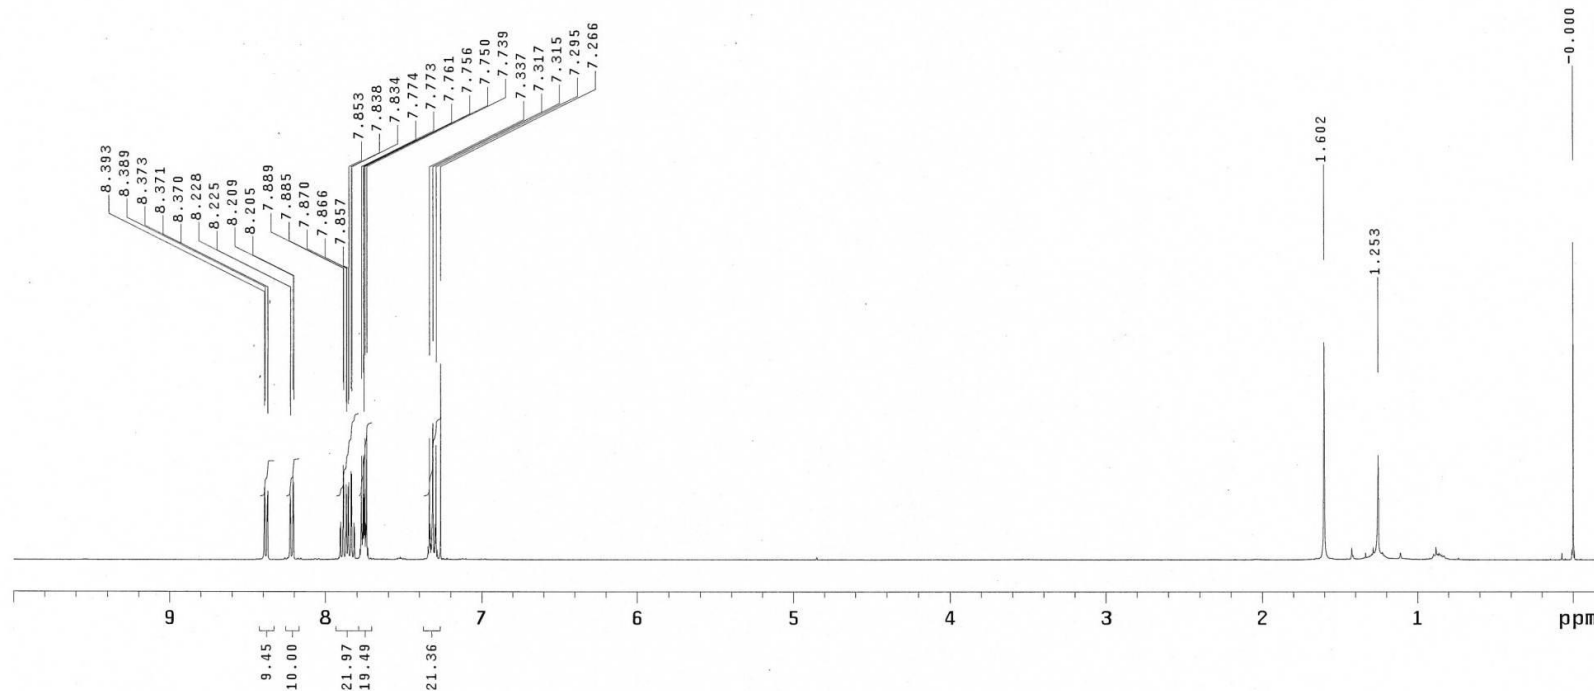

NP-4C1

Pulse Sequence: s2pu1

Mercury-400BB "MercuryPlus400"

Date: Mar 13 2014

Solvent: CDCl<sub>3</sub>

Ambient temperature

Total 28 repetitions

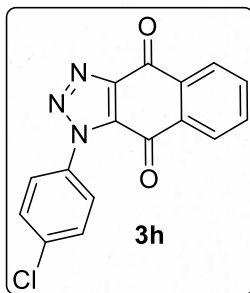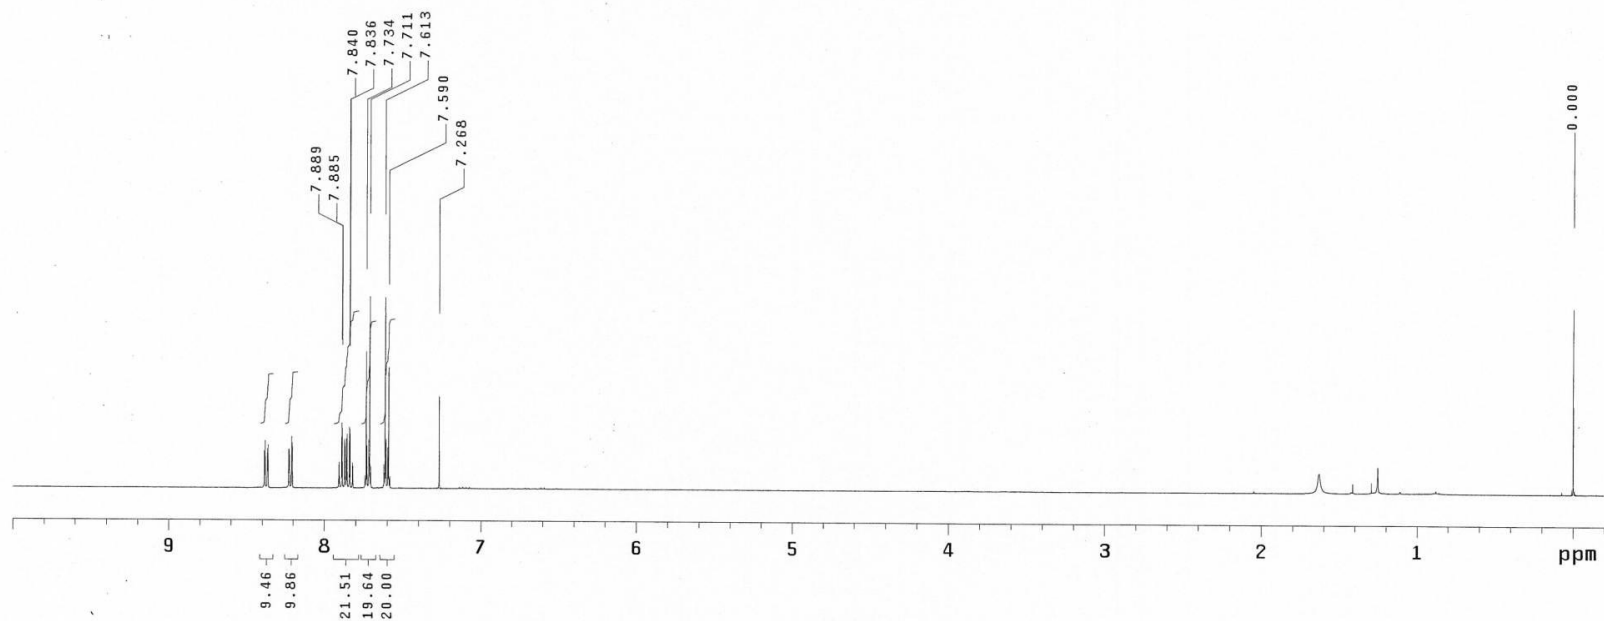

NP-4C1

Pulse Sequence: s2pu1

Mercury-400BB "MercuryPlus400"

Date: Mar 13 2014

Solvent: CDCl<sub>3</sub>

Ambient temperature

Total 2528 repetitions

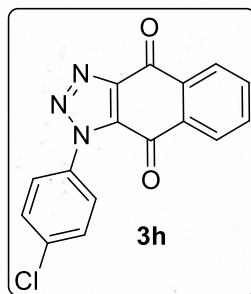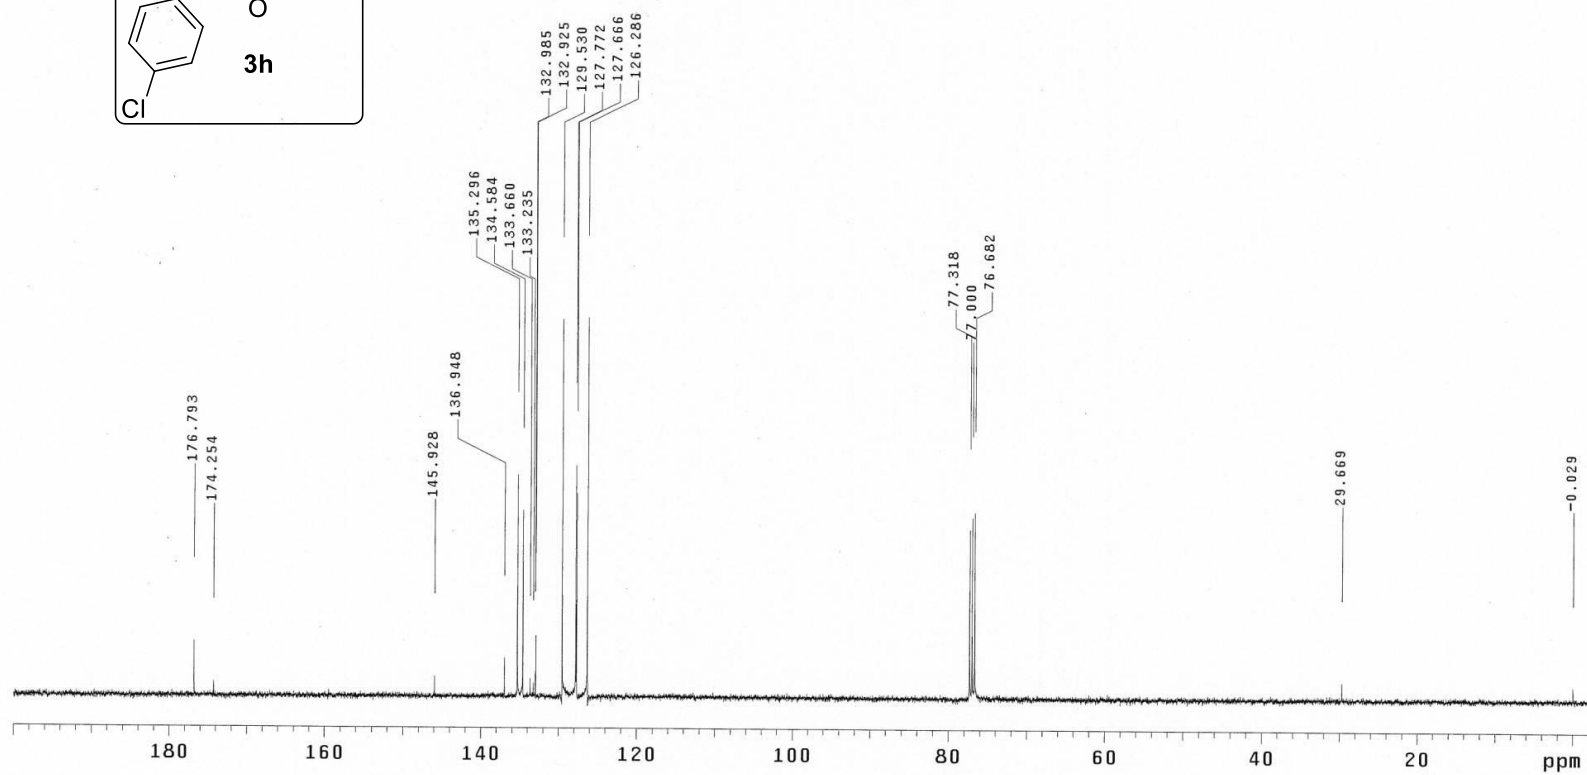

NP-3C1

Pulse Sequence: s2pu1

Mercury-400BB "MercuryPlus400"

Date: Mar 27 2014

Solvent: CDCl<sub>3</sub>

Ambient temperature

Total 32 repetitions

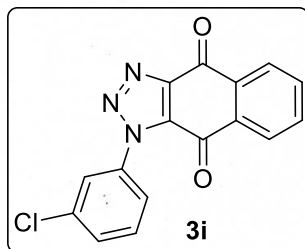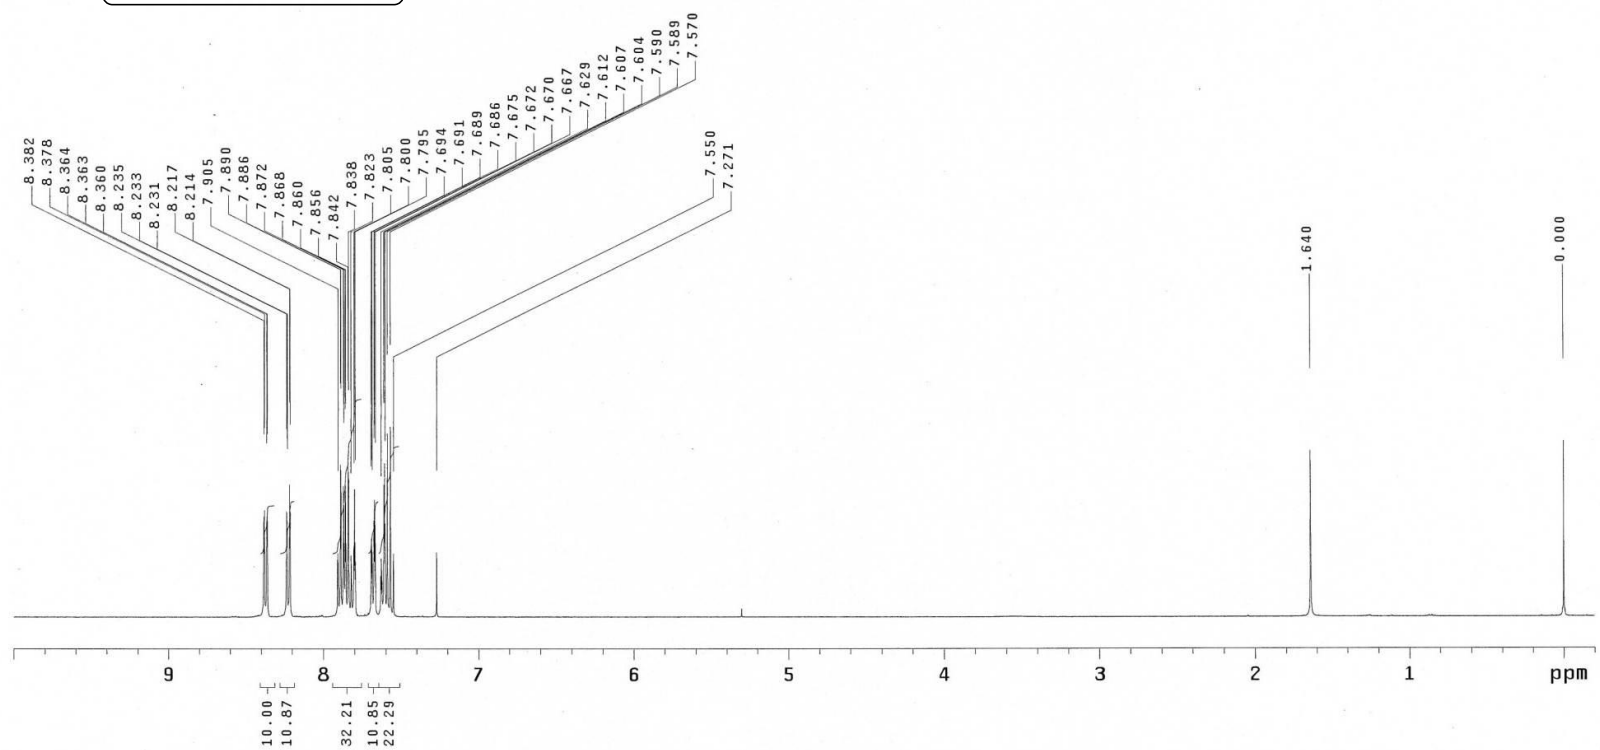

NP-3C1

Pulse Sequence: s2pu1

Mercury-400BB "MercuryPlus400"

Date: Mar 27 2014

Solvent: CDCl<sub>3</sub>

Ambient temperature

Total 9776 repetitions

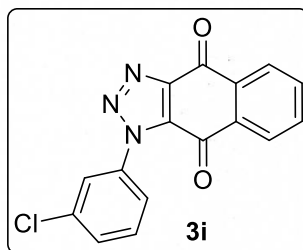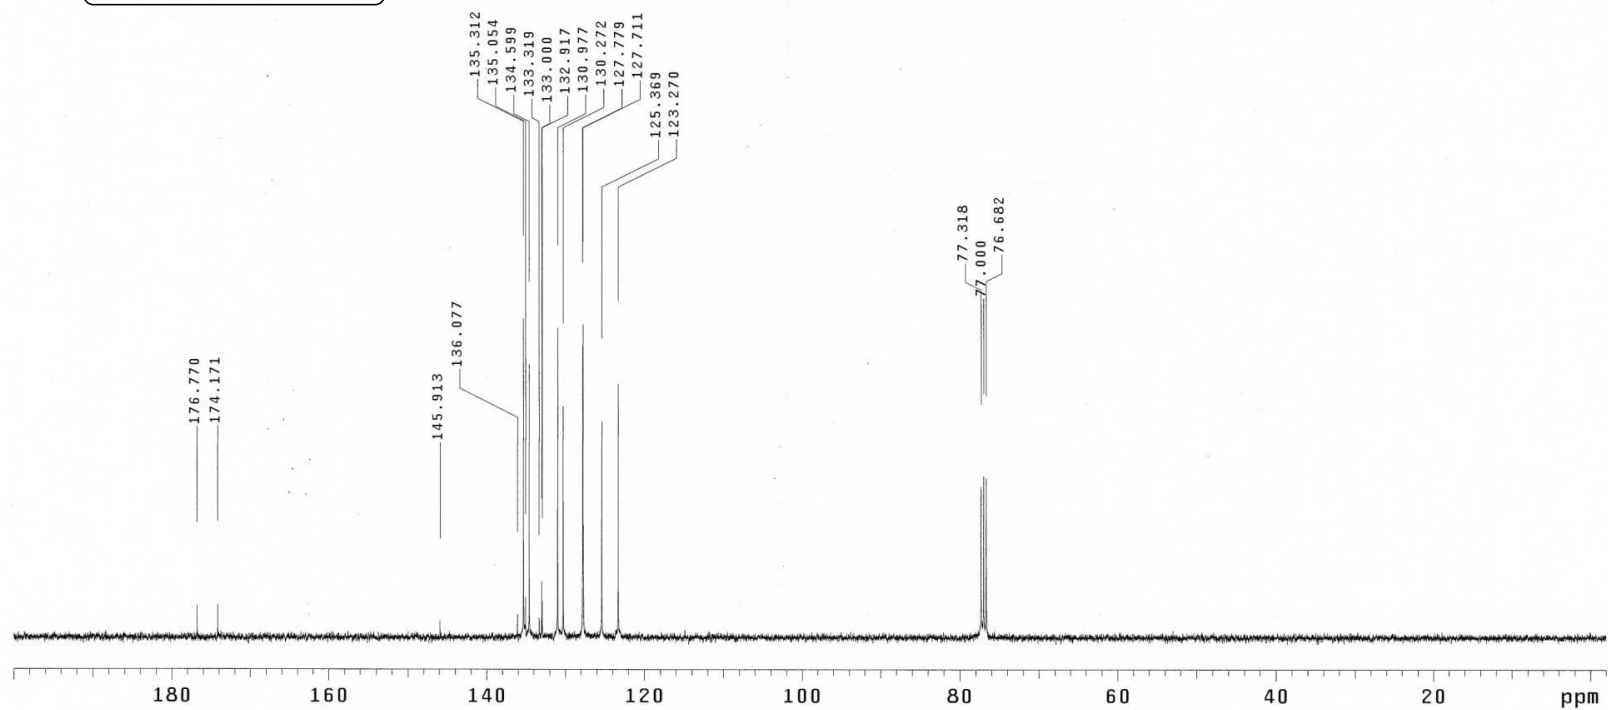

NP-2C1

Pulse Sequence: s2pu1  
UNITYplus-400 "unity400"  
Date: Apr 21 2014  
Solvent: CDCl3  
Ambient temperature  
Total 64 repetitions

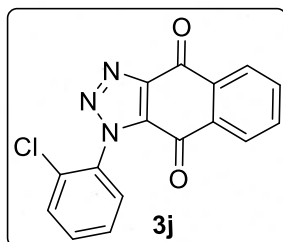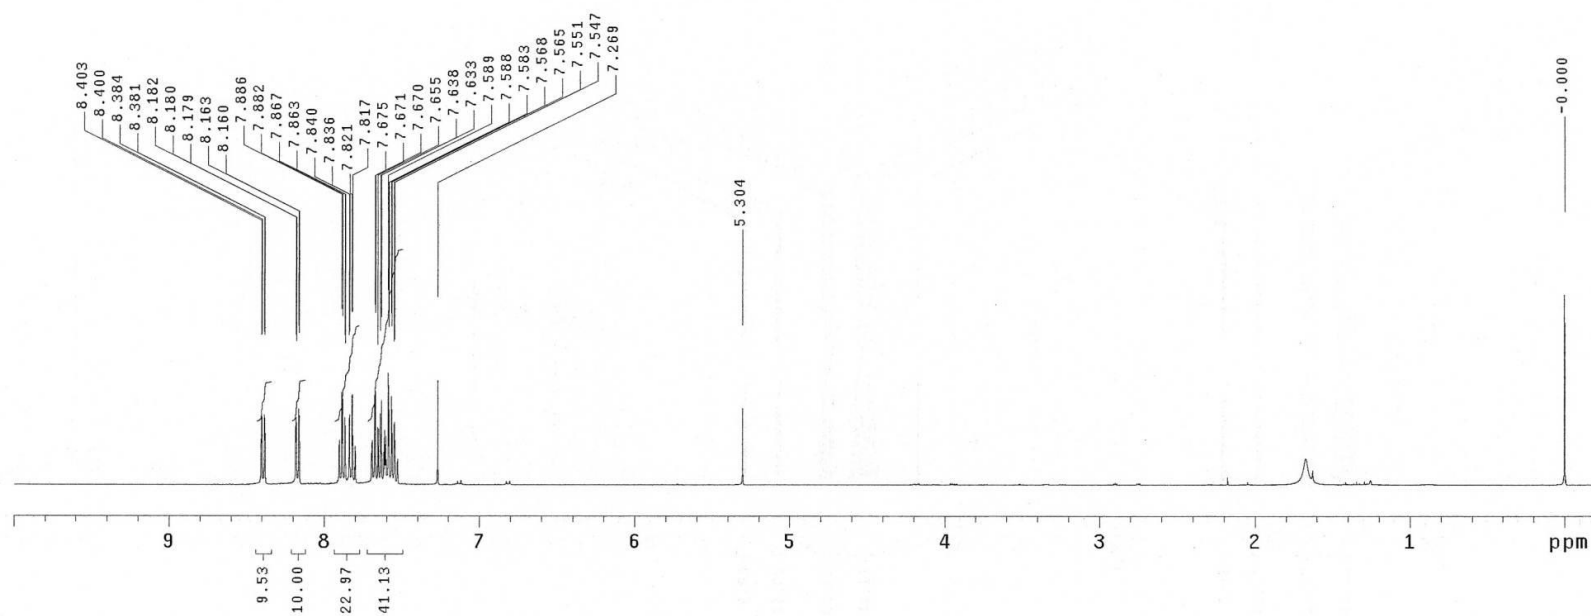

NP-2C1

Pulse Sequence: s2pu1

UNITYplus-400 "unity400"

Date: Apr 21 2014

Solvent: CDCl<sub>3</sub>

Ambient temperature

Total 4288 repetitions

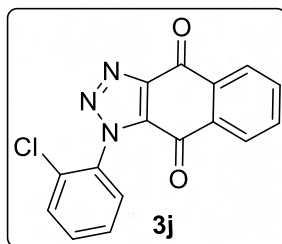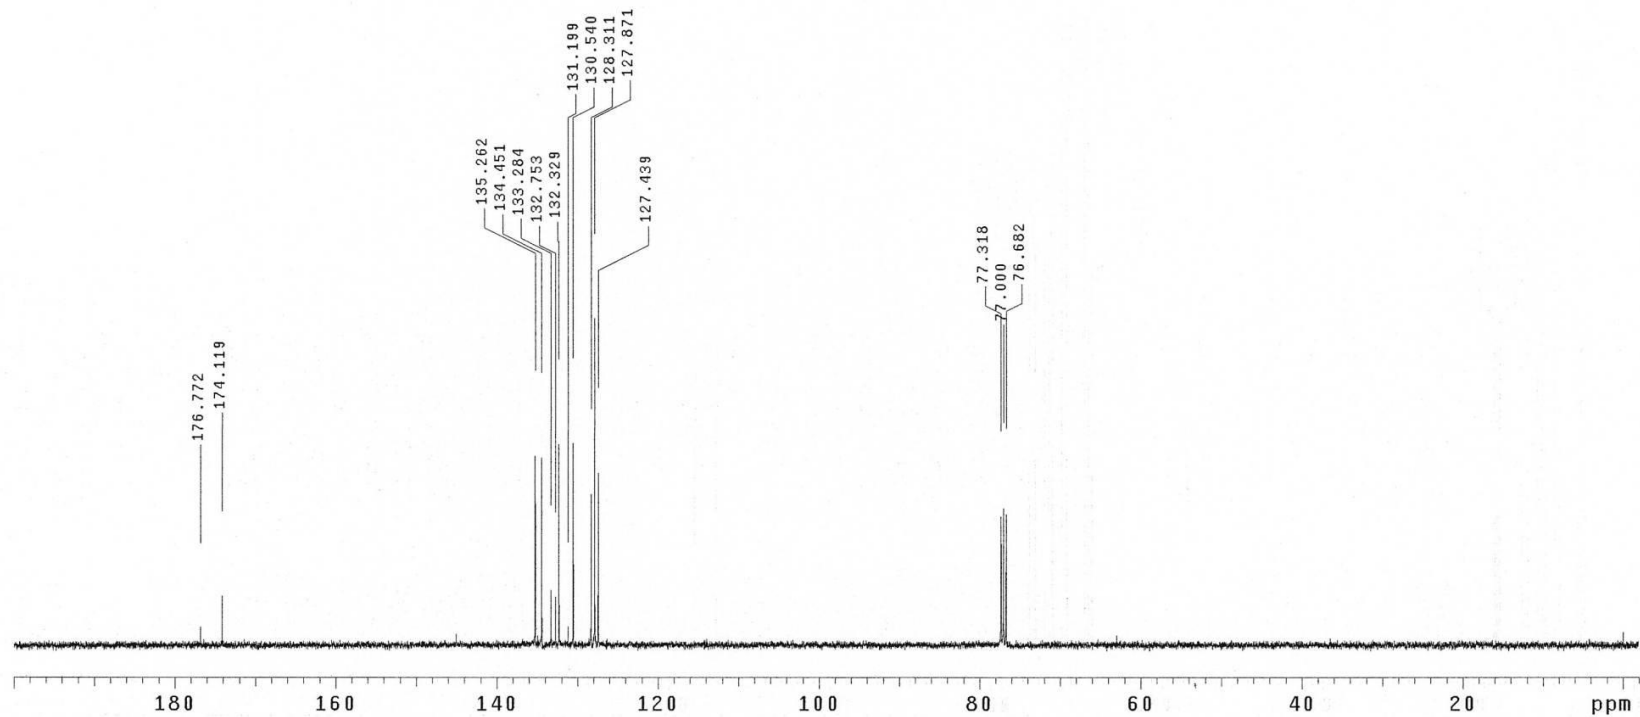

NP-4Br

Pulse Sequence: s2pu1

UNITYplus-400 "unity400"

Date: Apr 21 2014

Solvent: CDCl<sub>3</sub>

Ambient temperature

Total 64 repetitions

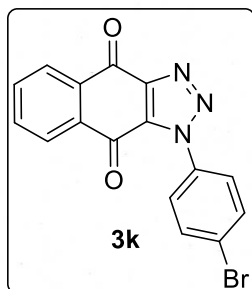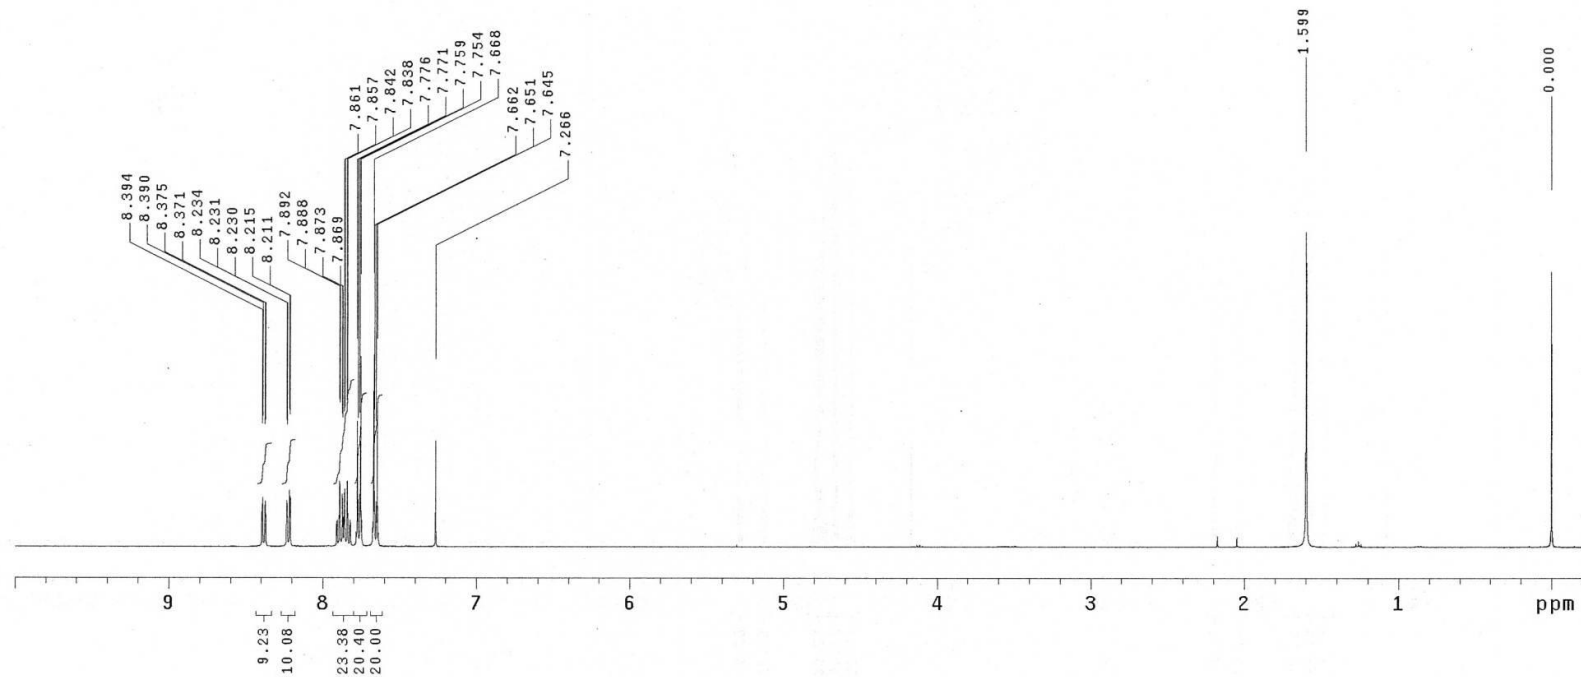

NP-4Br

Pulse Sequence: s2pu1

UNITYplus-400 "unity400"

Date: Apr 21 2014

Solvent: CDCl<sub>3</sub>

Ambient temperature

Total 10784 repetitions

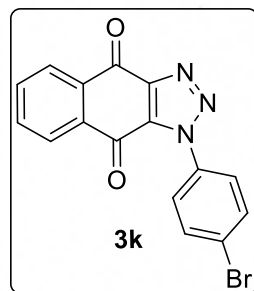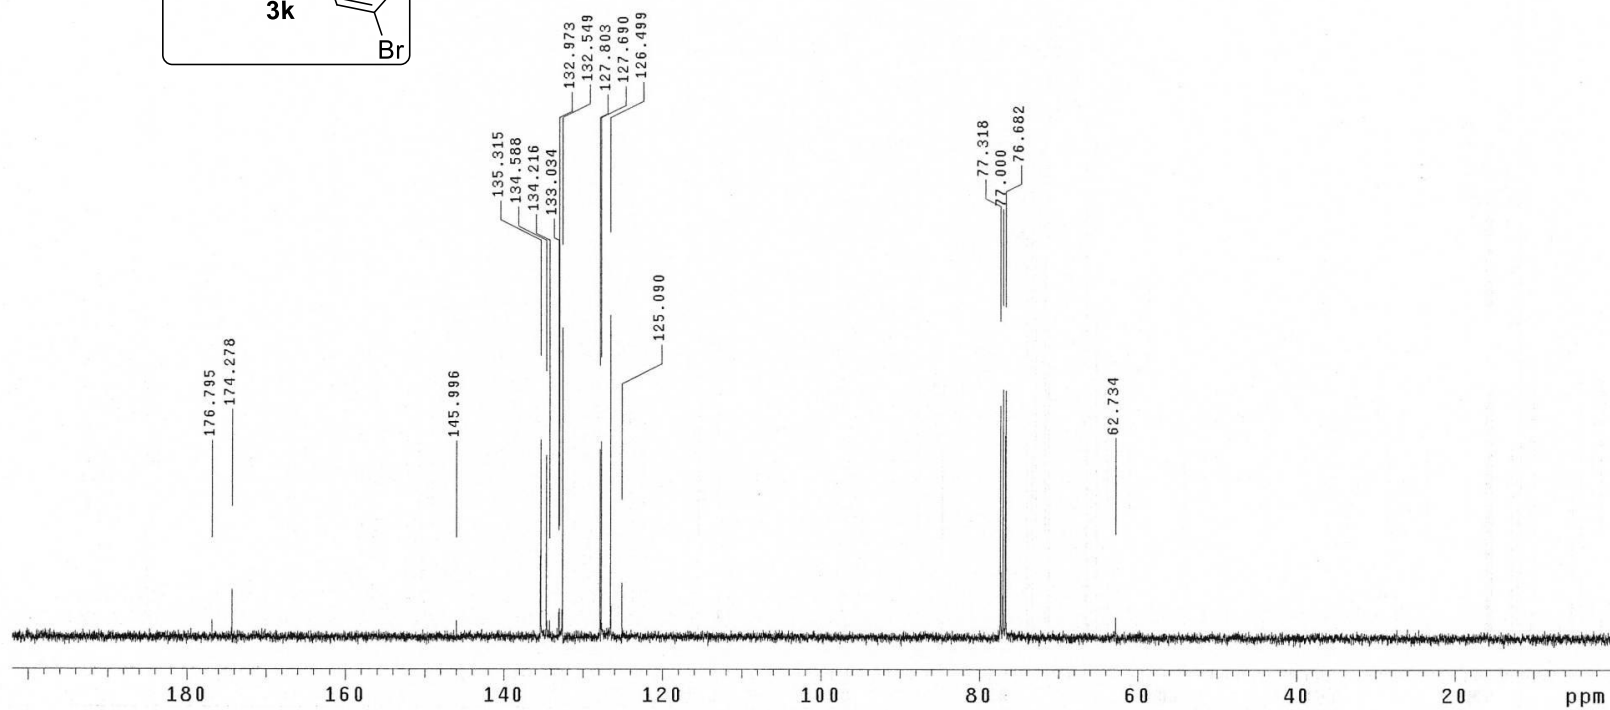

NP-4I

Pulse Sequence: s2pu1

Mercury-400BB "MercuryPlus400"

Date: Aug 7 2014

Solvent: CDCl<sub>3</sub>

Ambient temperature

Total 48 repetitions

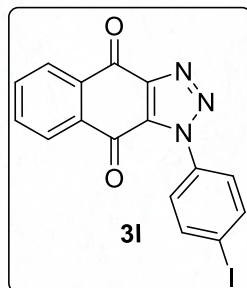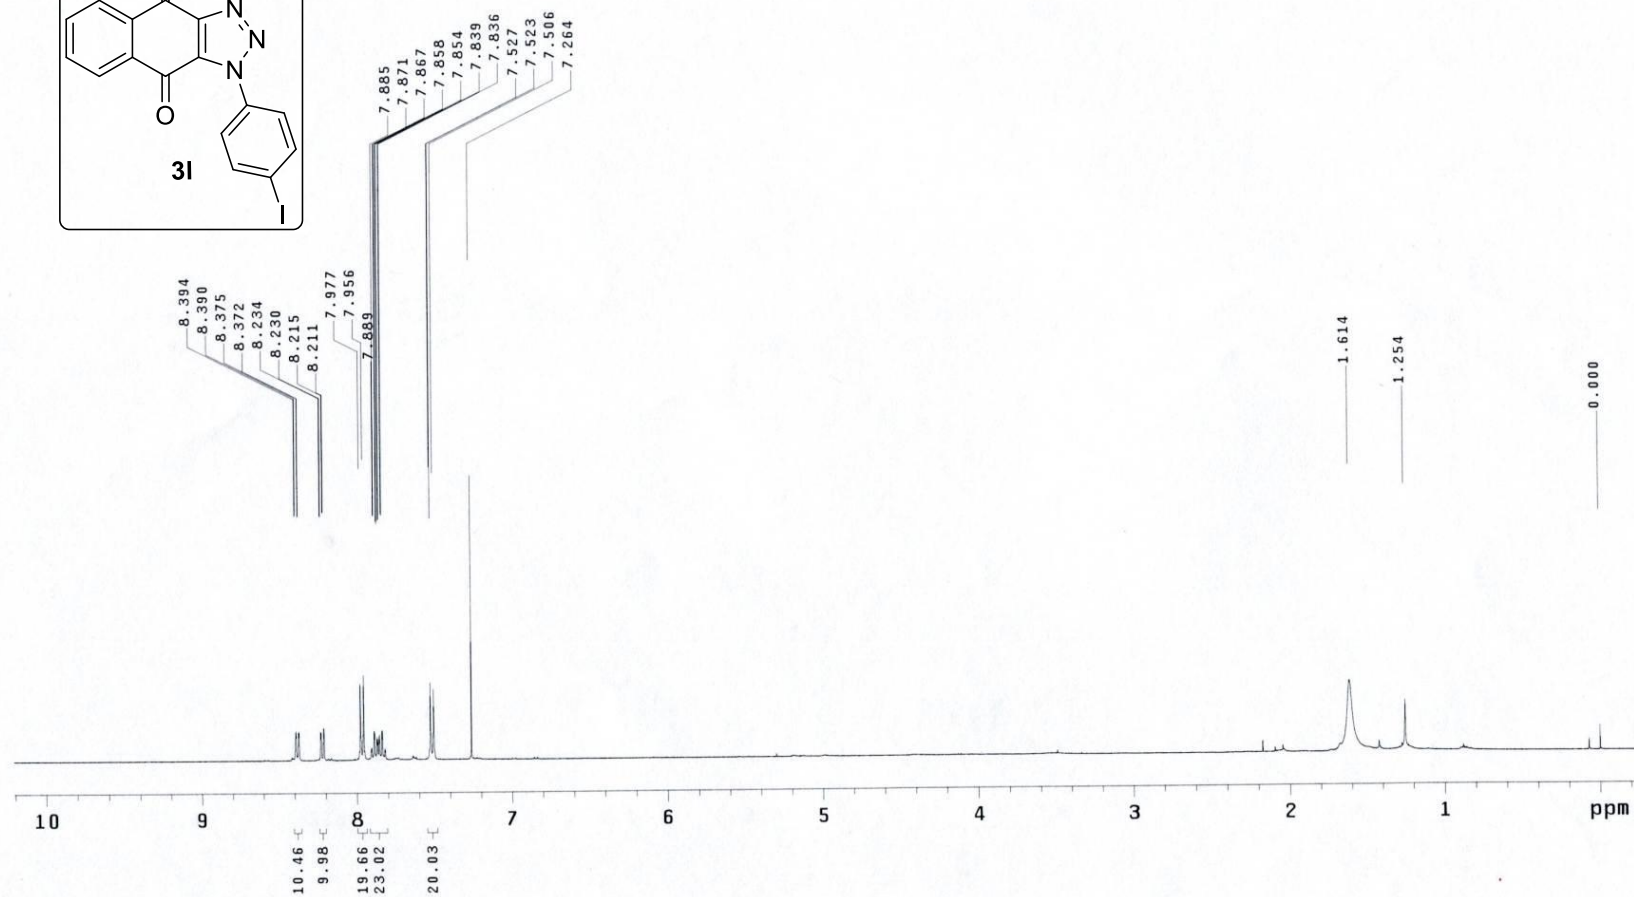

NP-4I

Pulse Sequence: s2pu1

Mercury-400BB "MercuryPlus400"

Date: Aug 7 2014

Solvent: CDCl<sub>3</sub>

Ambient temperature

Total 59344 repetitions

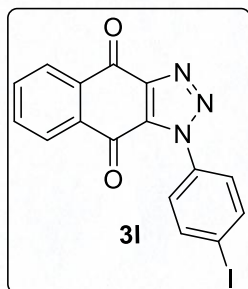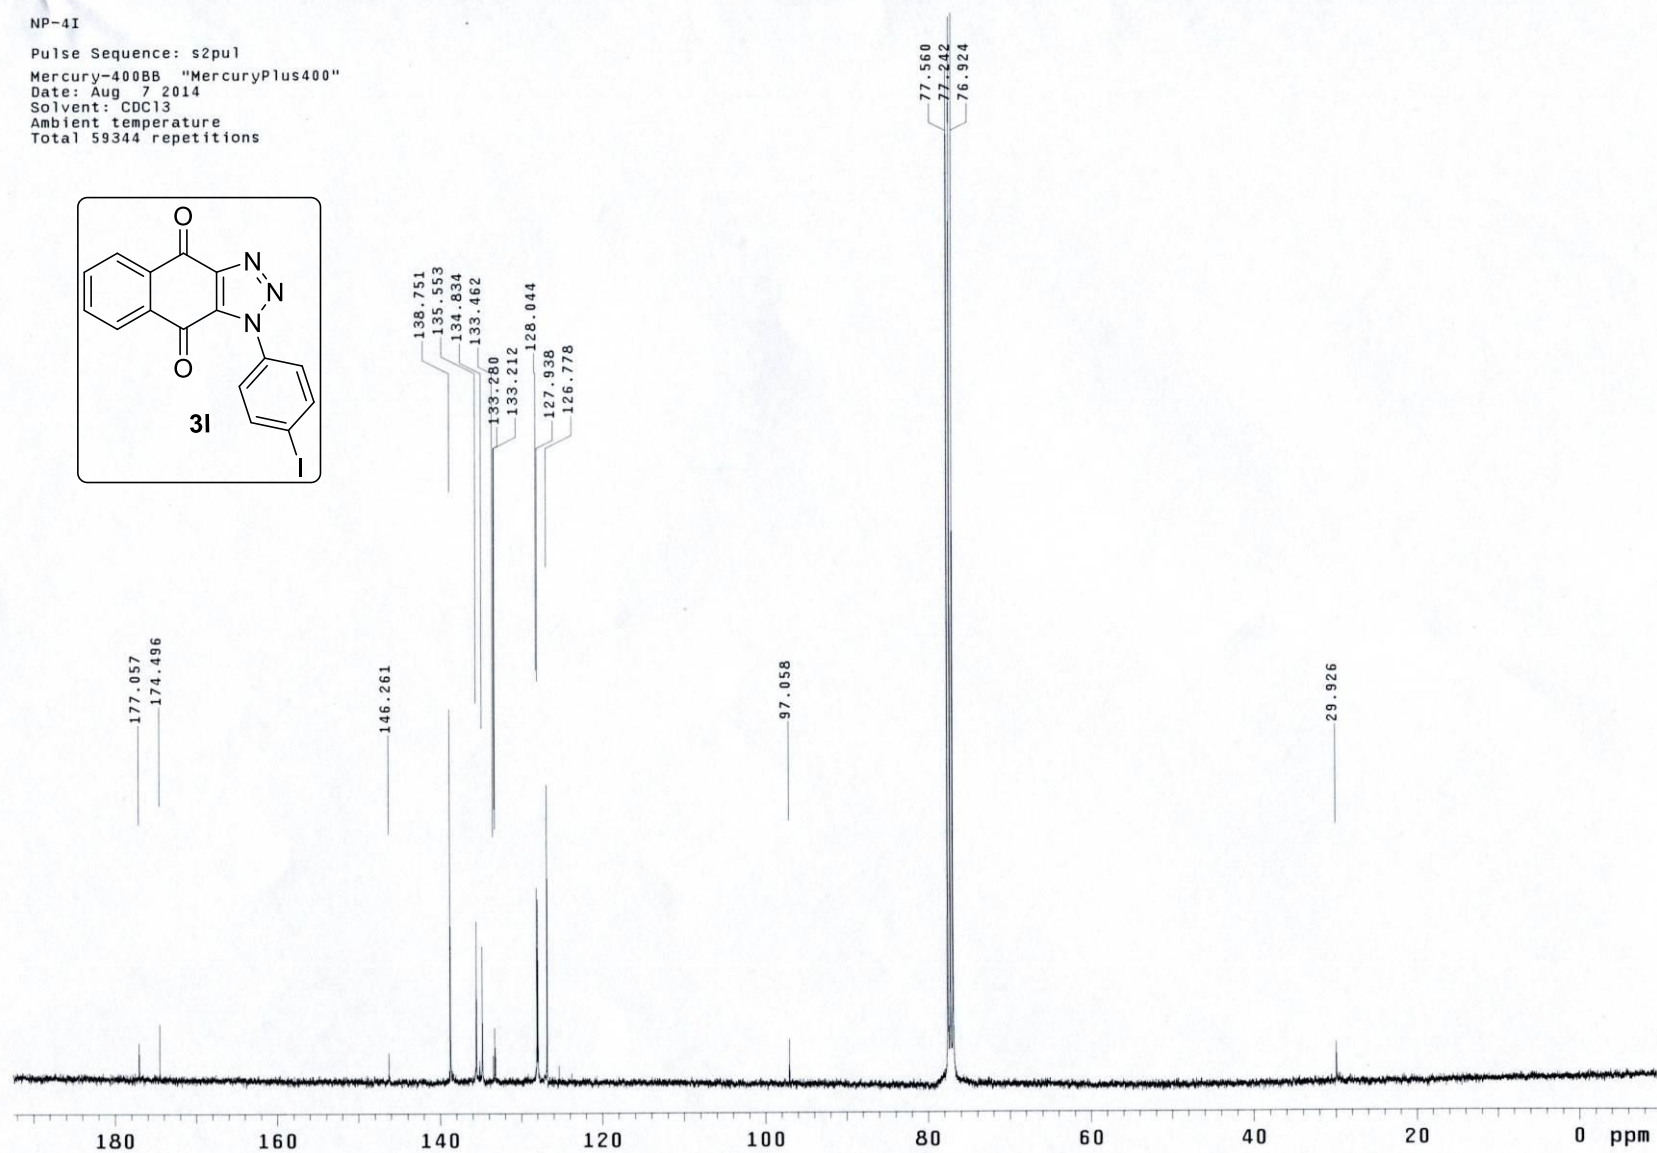

NP+5C

Pulse Sequence: s2pu1

Mercury-400BB "MercuryPlus400"

Date: May 14 2014

Solvent: CDCl<sub>3</sub>

Ambient temperature

Total 32 repetitions

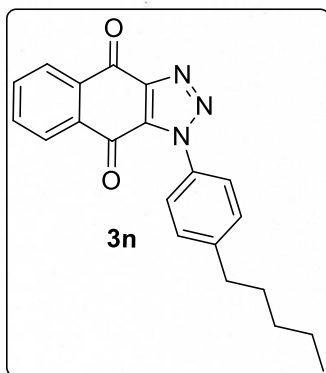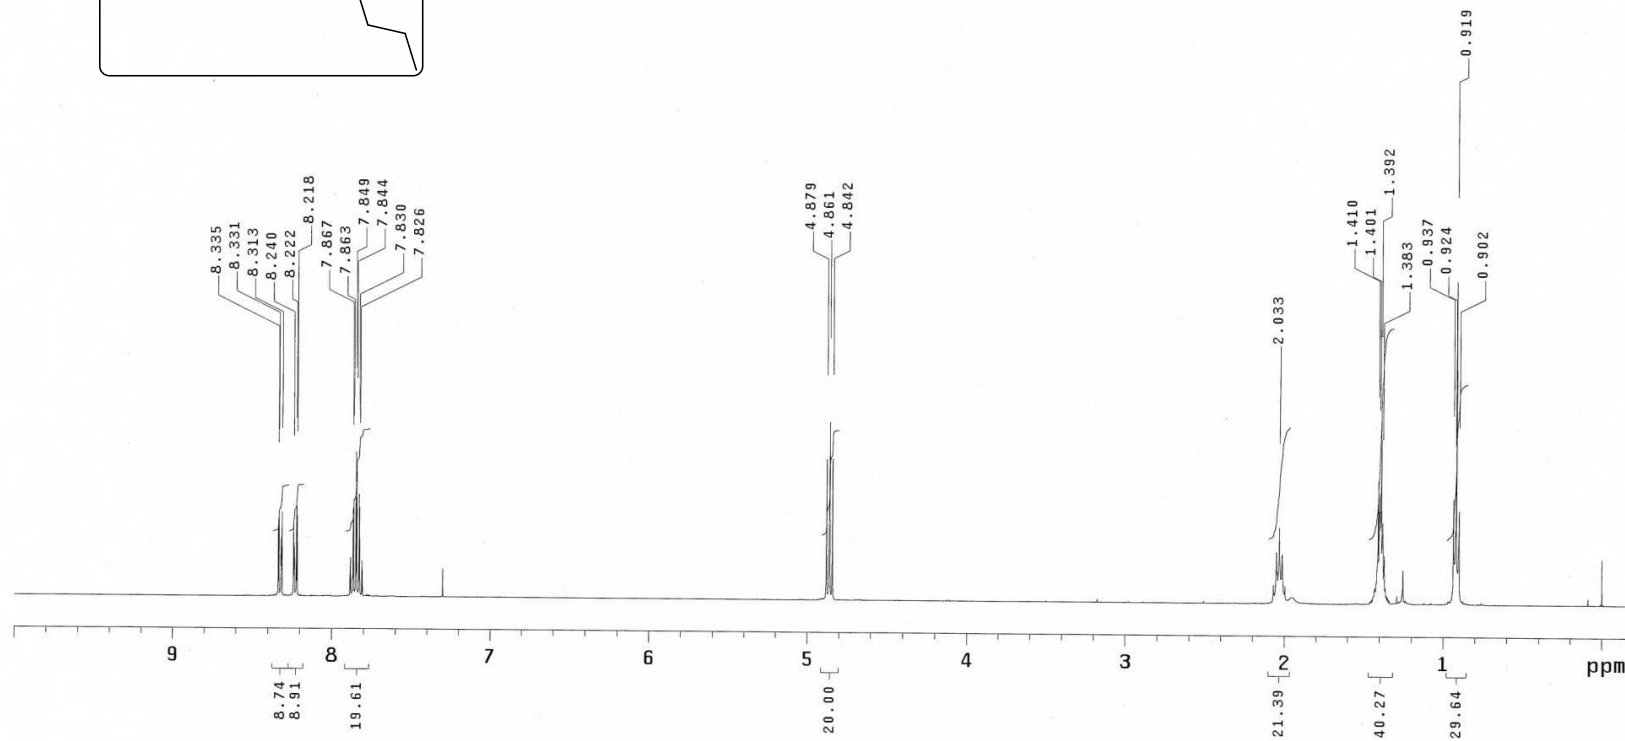

NP+5C

Pulse Sequence: s2pu1

Mercury-400BB "MercuryPlus400"

Date: May 14 2014

Solvent: CDCl<sub>3</sub>

Ambient temperature

Total 1840 repetitions

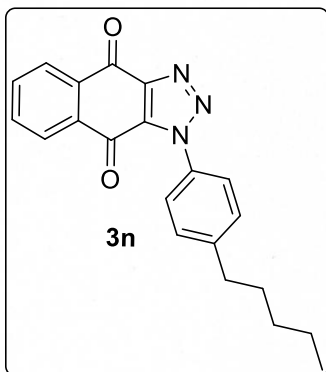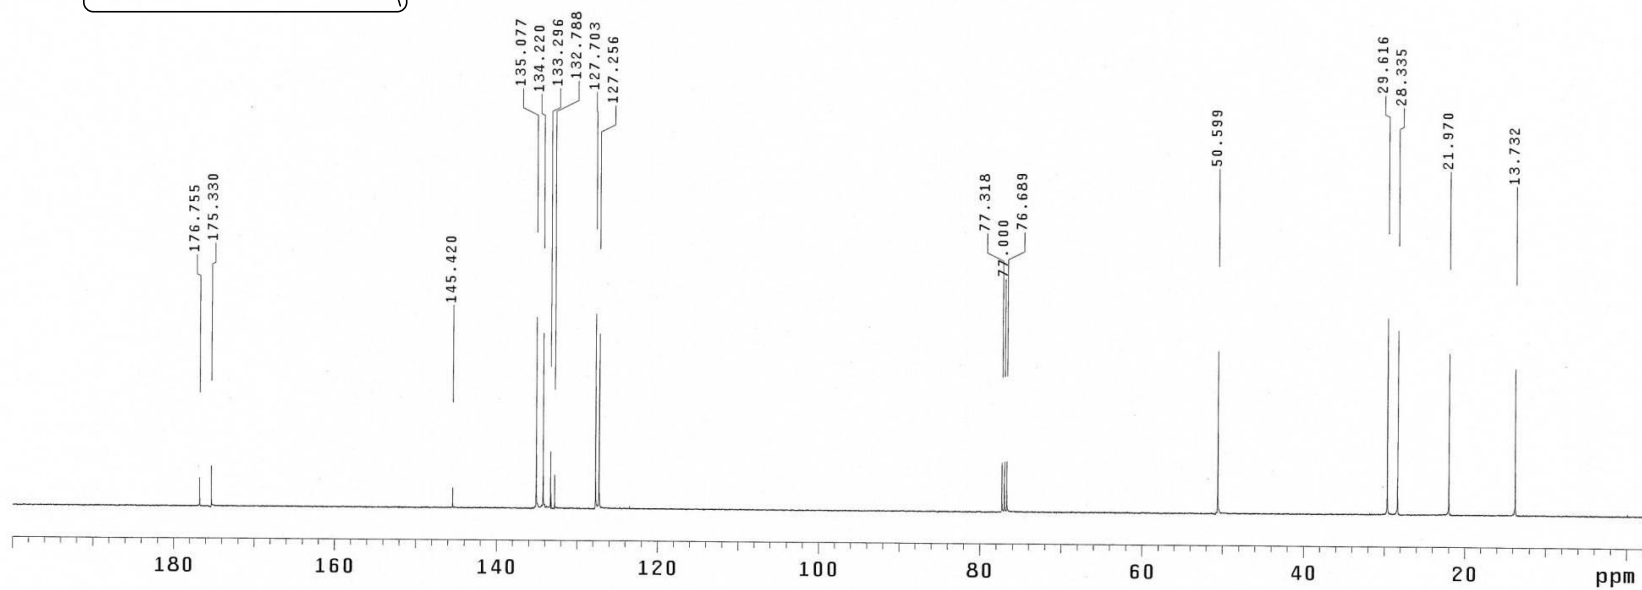

NP-10C

Pulse Sequence: s2pu1

Mercury-400BB "MercuryPlus400"

Date: Mar 13 2014

Solvent: CDCl<sub>3</sub>

Ambient temperature

Total 32 repetitions

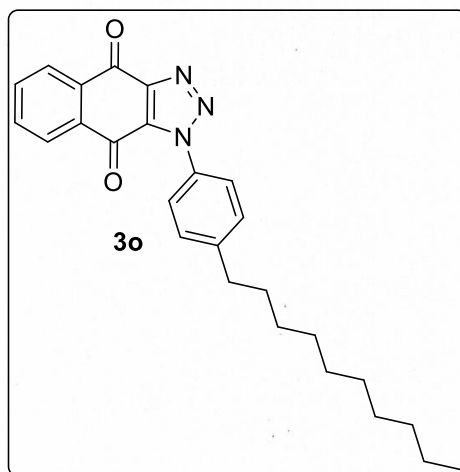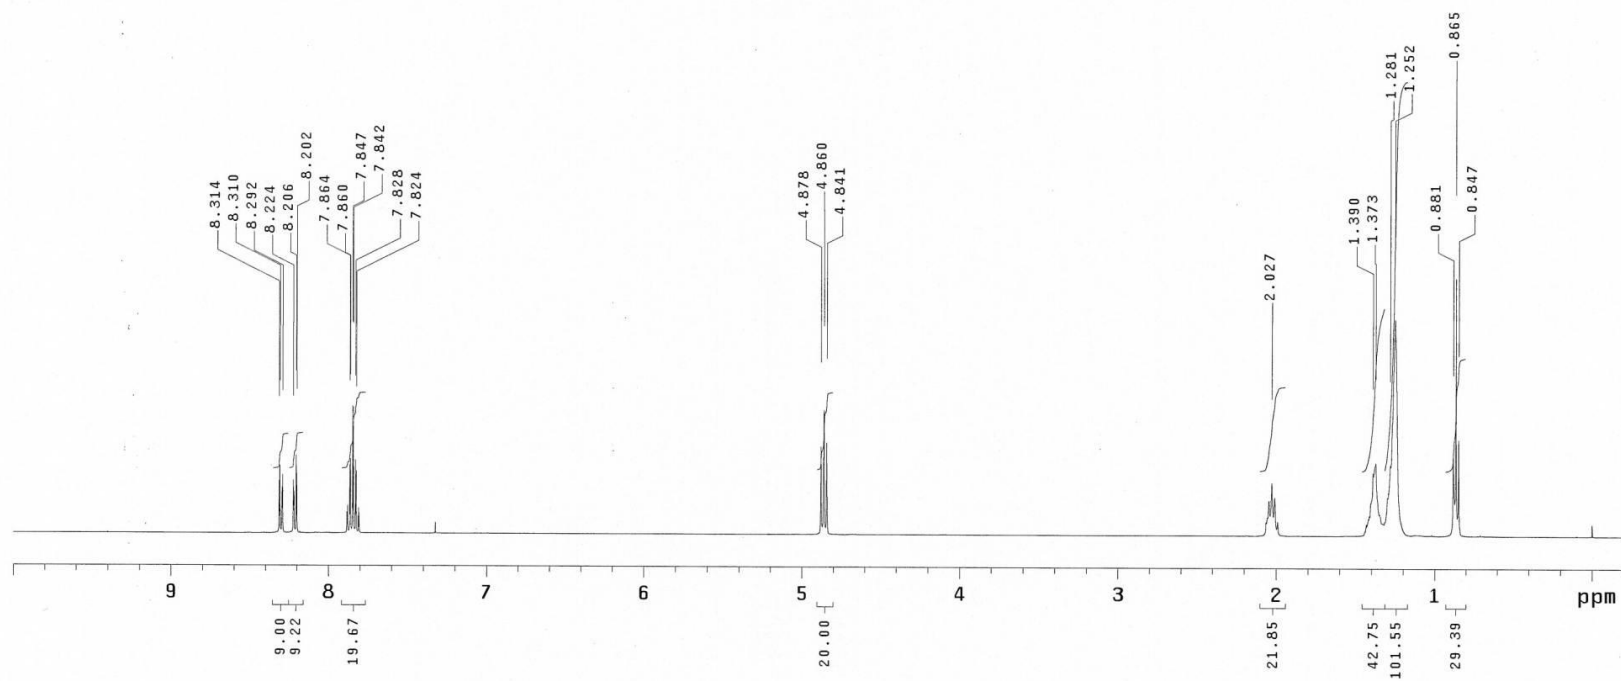

NP-10C

Pulse Sequence: s2pu1

Mercury-400BB : "MercuryPlus400"

Date: Mar 13 2014

Solvent: CDCl<sub>3</sub>

Ambient temperature

Total 2240 repetitions

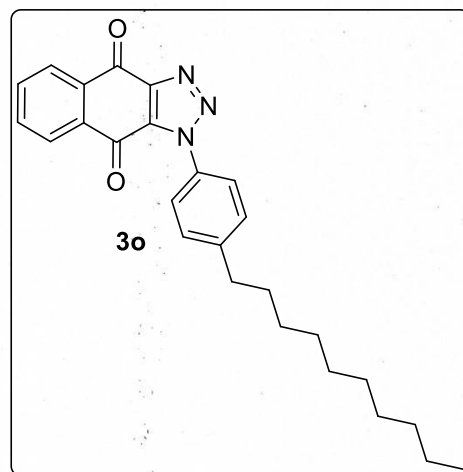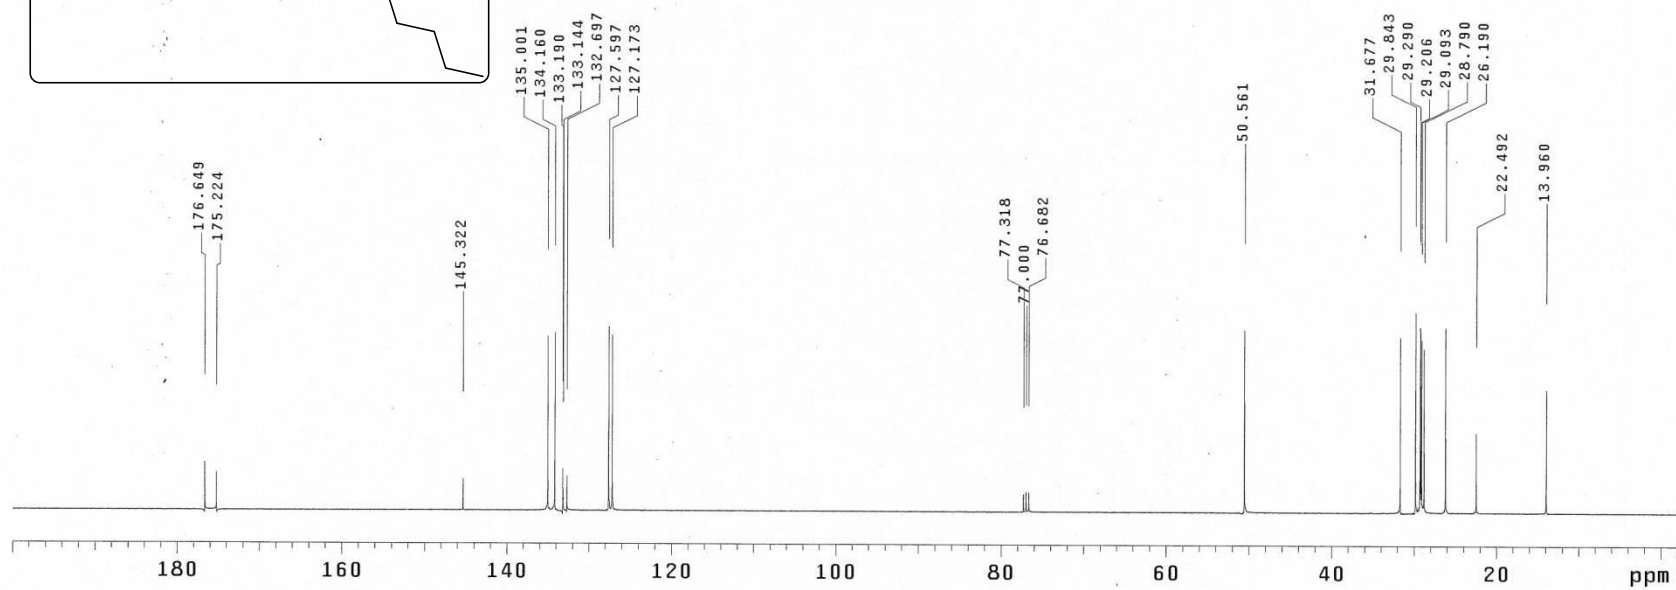

NP-Bn

Pulse Sequence: s2pu1

UNITYplus-400 "unity400"

Date: Mar 5 2014

Solvent: CDCl<sub>3</sub>

Ambient temperature

Total 32 repetitions

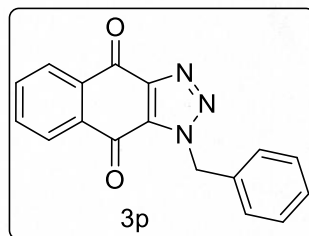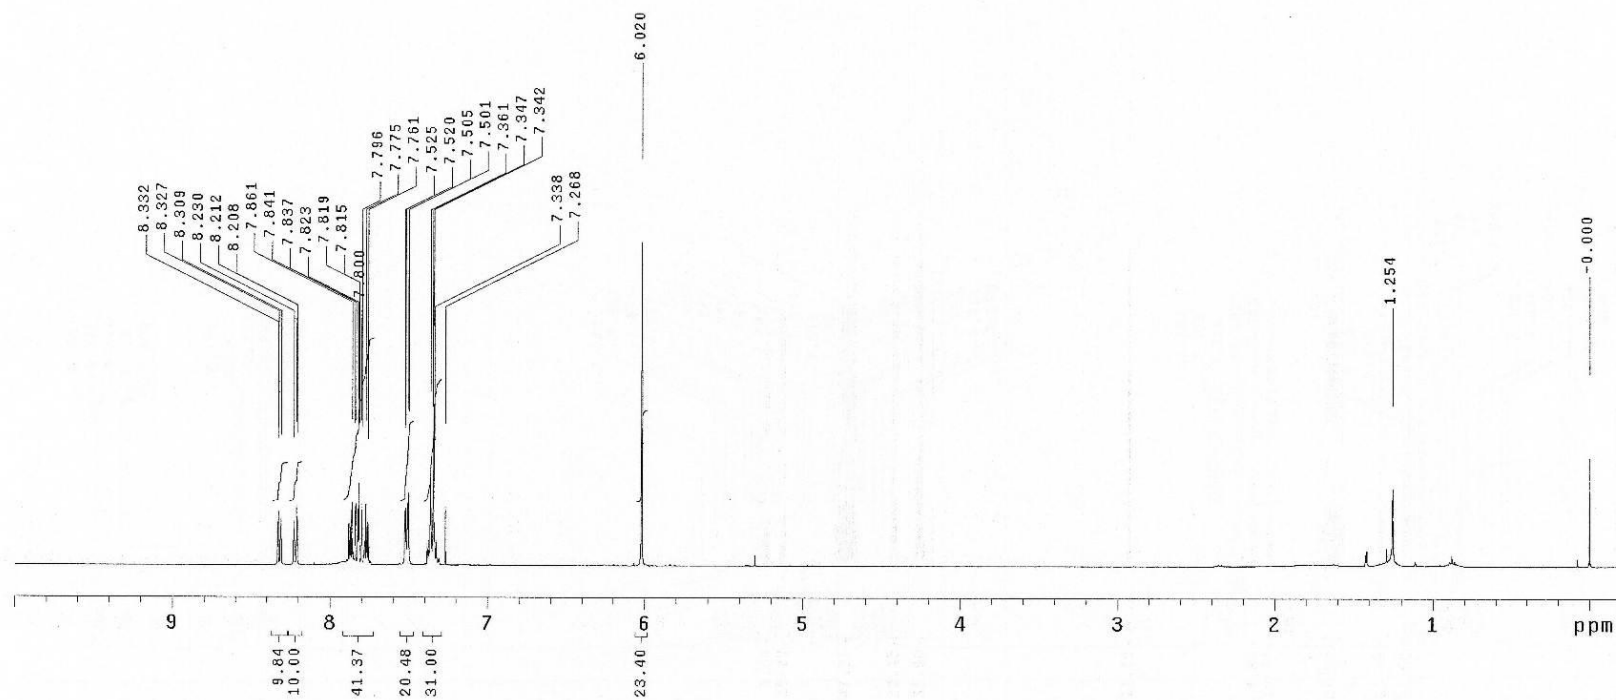

NP-Bn

Pulse Sequence: s2pu1

UNITYplus-400 "unity400"

Date: Mar 5 2014

Solvent: CDCl<sub>3</sub>

Ambient temperature

Total 3056 repetitions

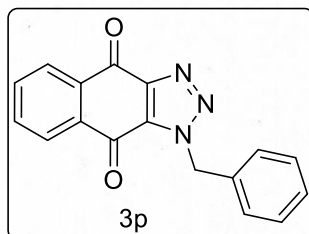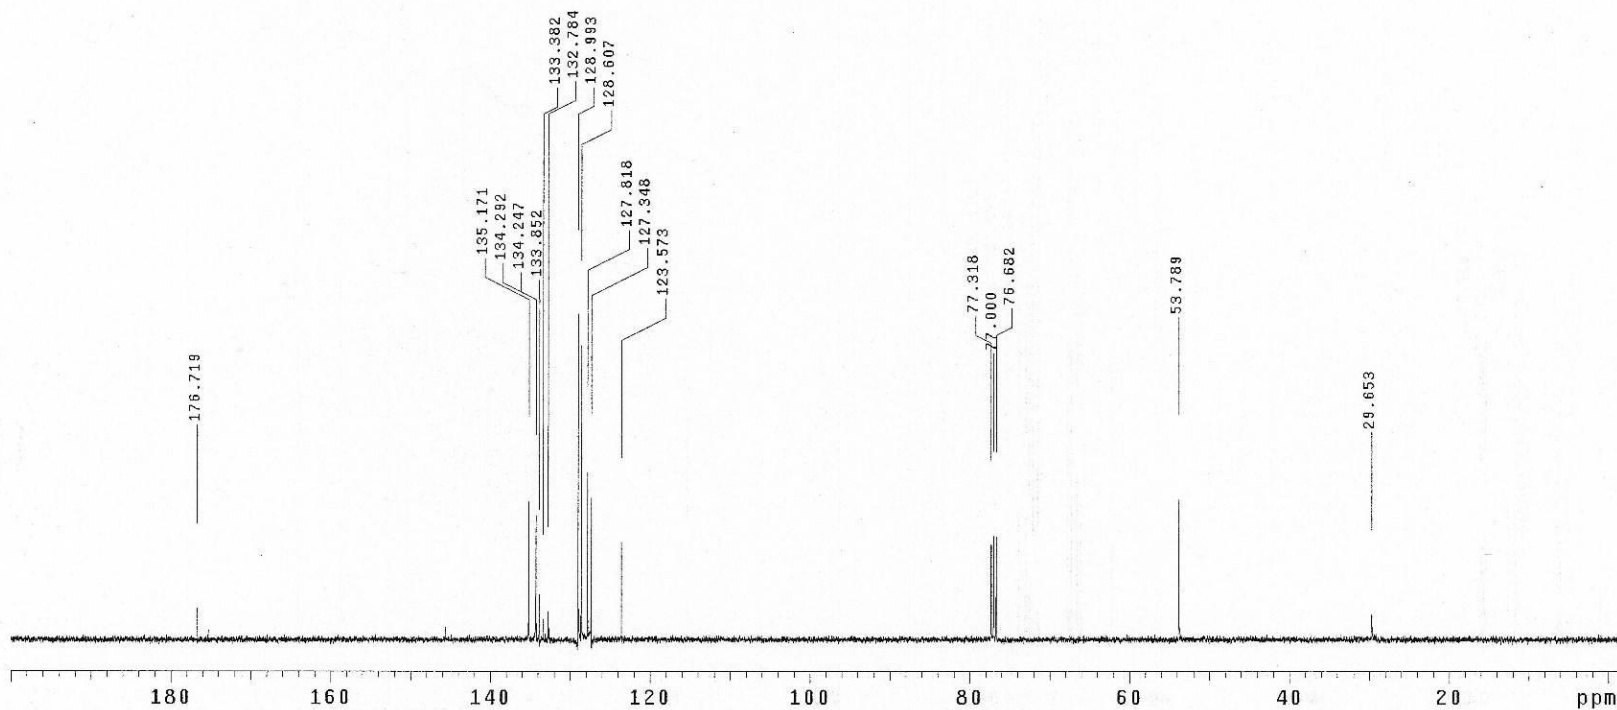

4N3-NP

Pulse Sequence: s2pu1

UNITYplus-400 "unity400"

Date: Jun 26 2014

Solvent: CDC13

Ambient temperature

Total 64 repetitions

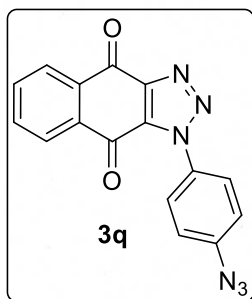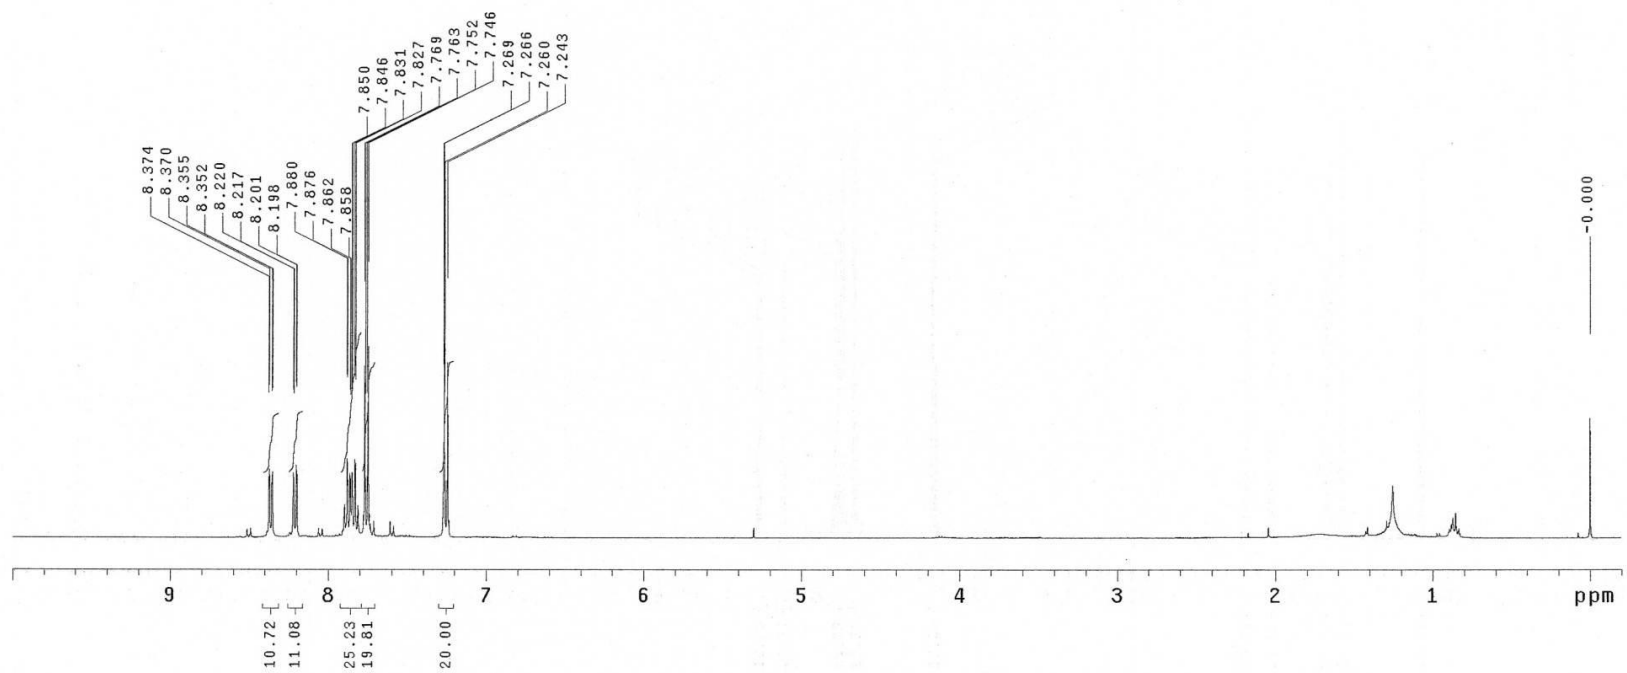

4N3-NP

Pulse Sequence: s2pu1

UNITYplus-400 "unity400"

Date: Jun 26 2014

Solvent: CDCl<sub>3</sub>

Ambient temperature

Total 29824 repetitions

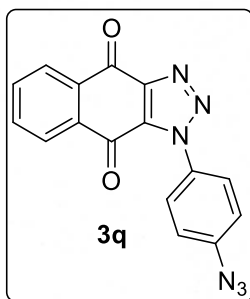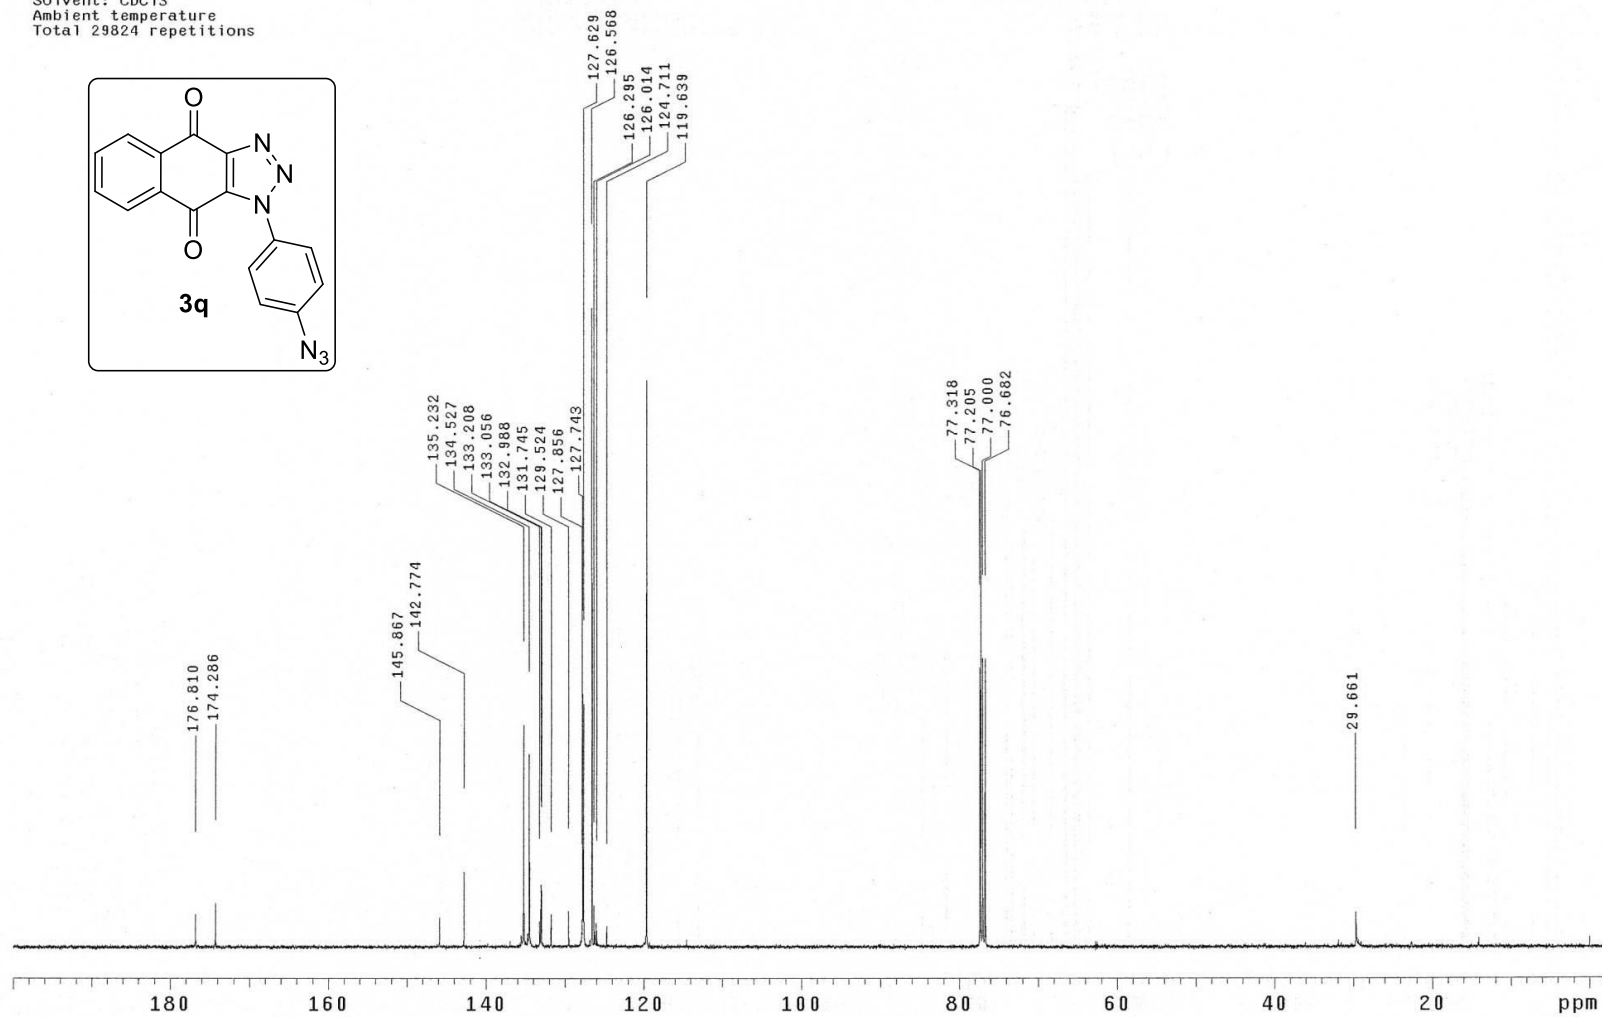

3N3-NP

Pulse Sequence: s2pu1

UNITYplus-400 "unity400"

Date: Jun 26 2014

Solvent: CDCl<sub>3</sub>

Ambient temperature

Total 64 repetitions

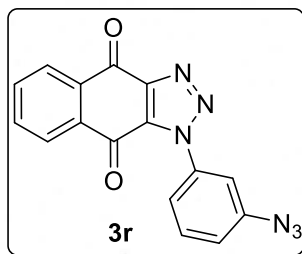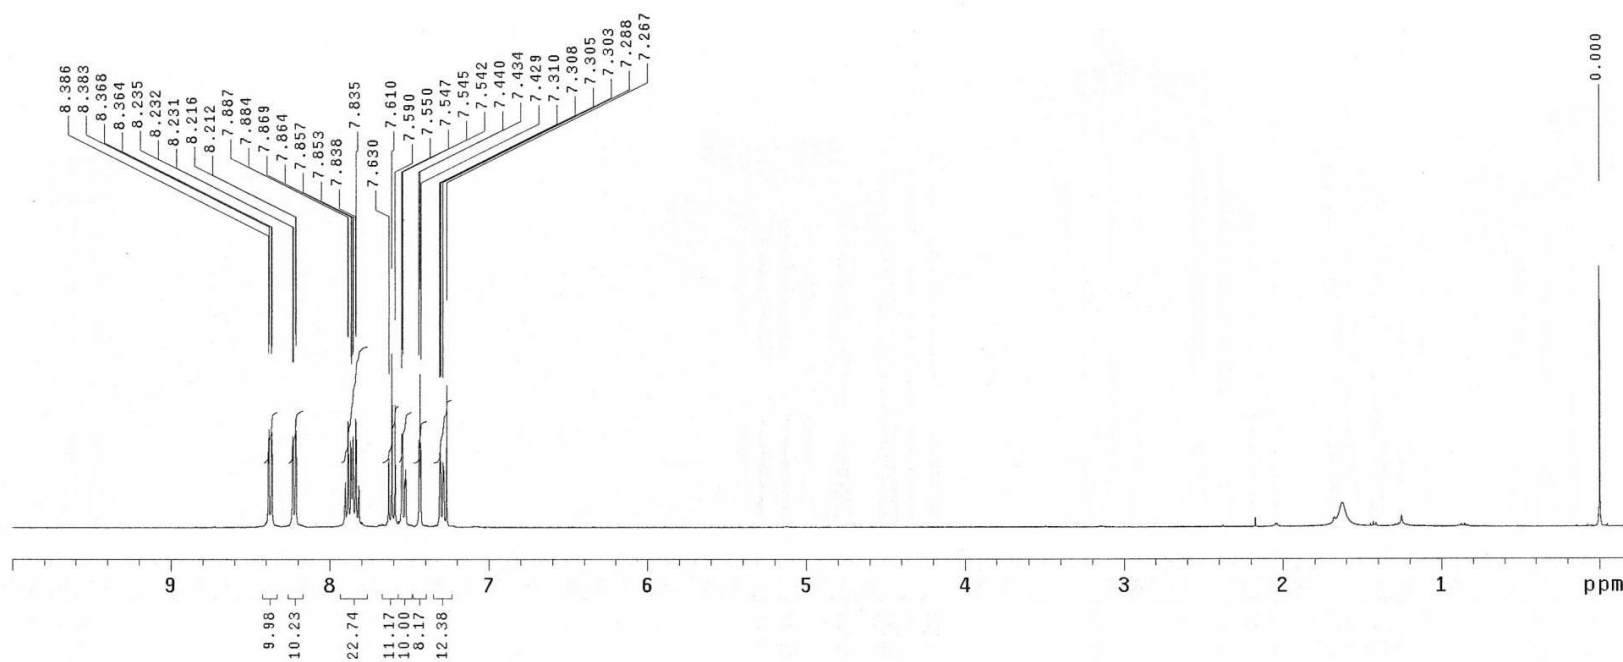

3N3-NP

Pulse Sequence: s2pu1  
UNITYplus-400 "unity400"  
Date: Jun 26 2014  
Solvent: CDCl<sub>3</sub>  
Ambient temperature  
Total 13328 repetitions

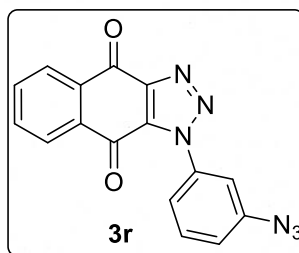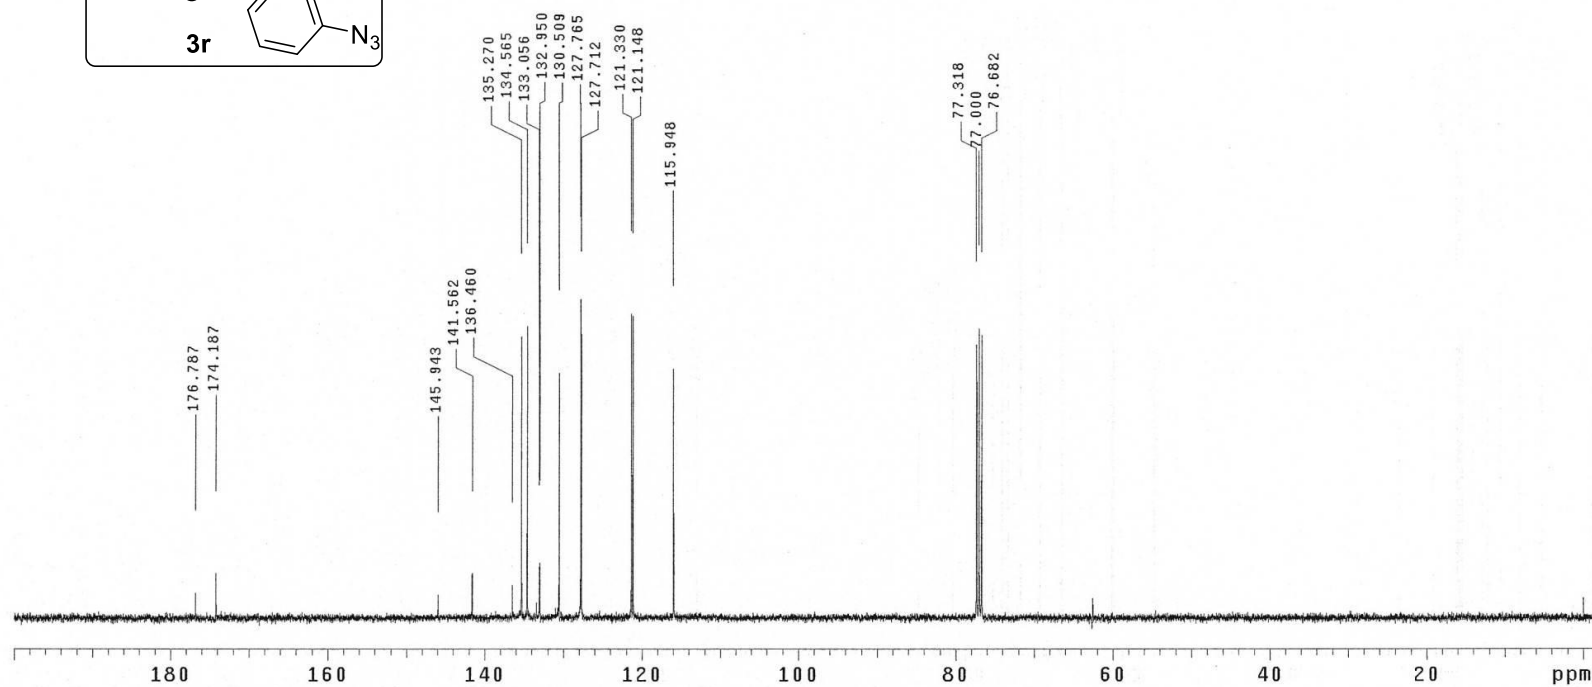

BNP-Tome

Pulse Sequence: s2pu1

UNITYplus-400 "unity400"

Date: Aug 21 2013

Solvent: CDCl<sub>3</sub>

Ambient temperature

Total 32 repetitions

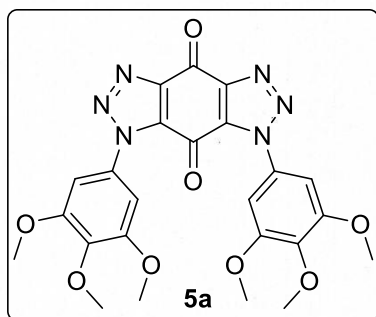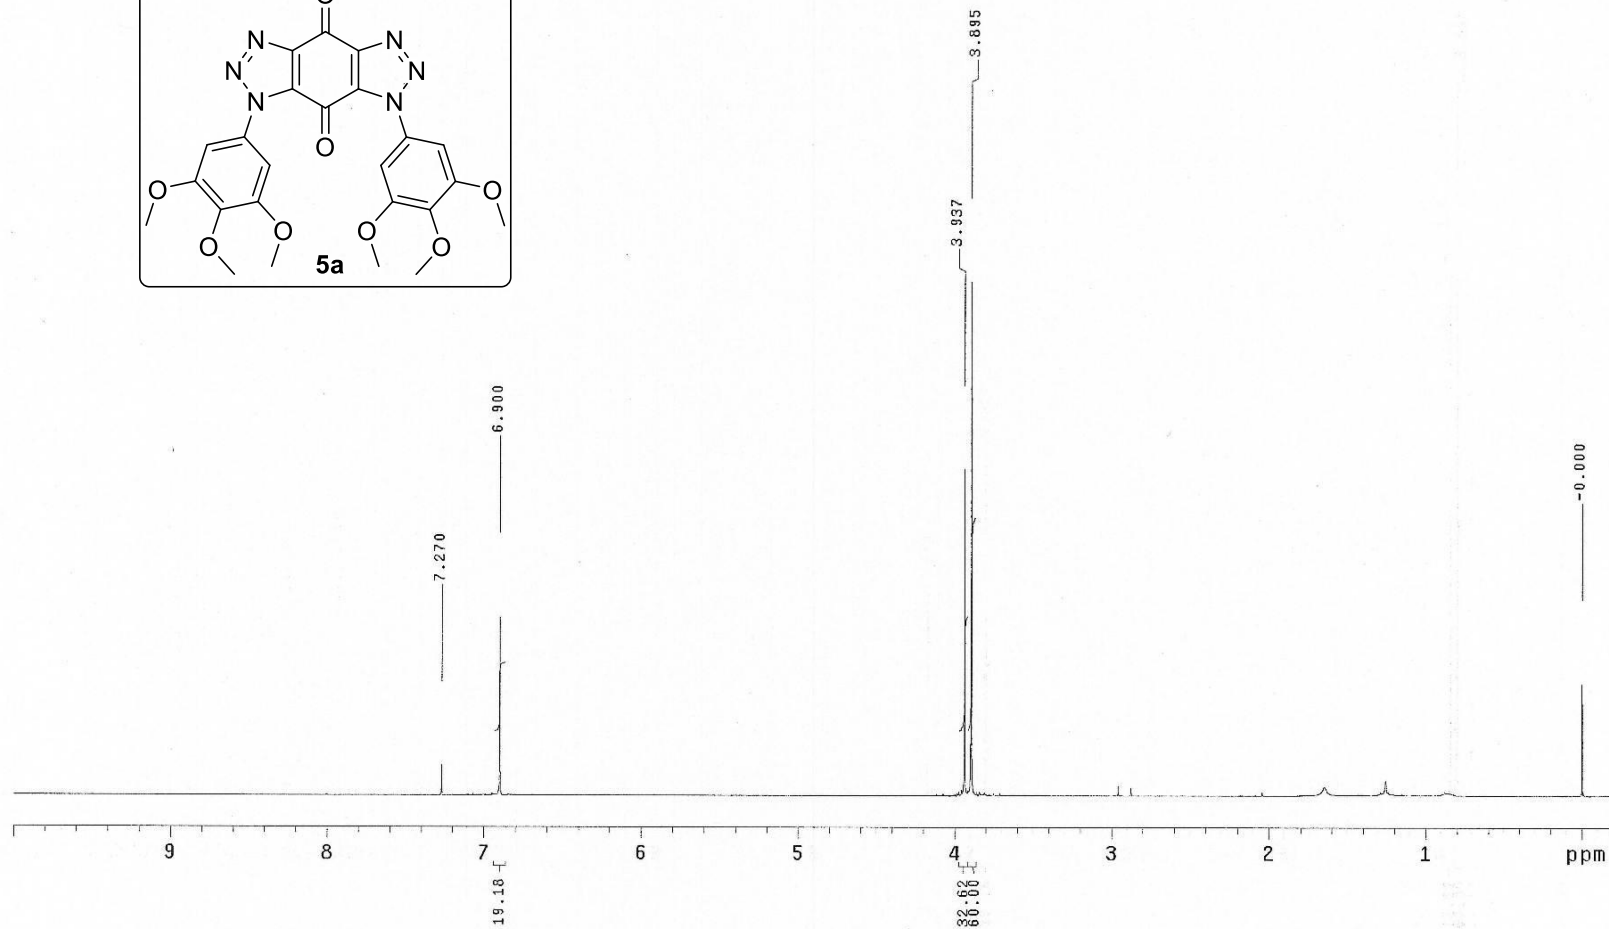

BNP-Tome

Pulse Sequence: s2pu1

UNITYplus-400 "unity400"

Date: Aug 21 2013

Solvent: CDCl<sub>3</sub>

Ambient temperature

Total 2048 repetitions

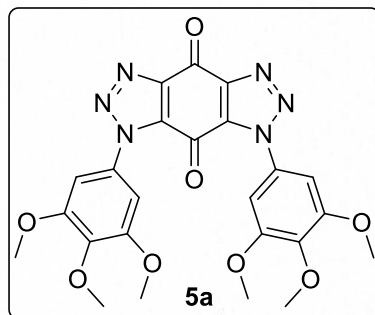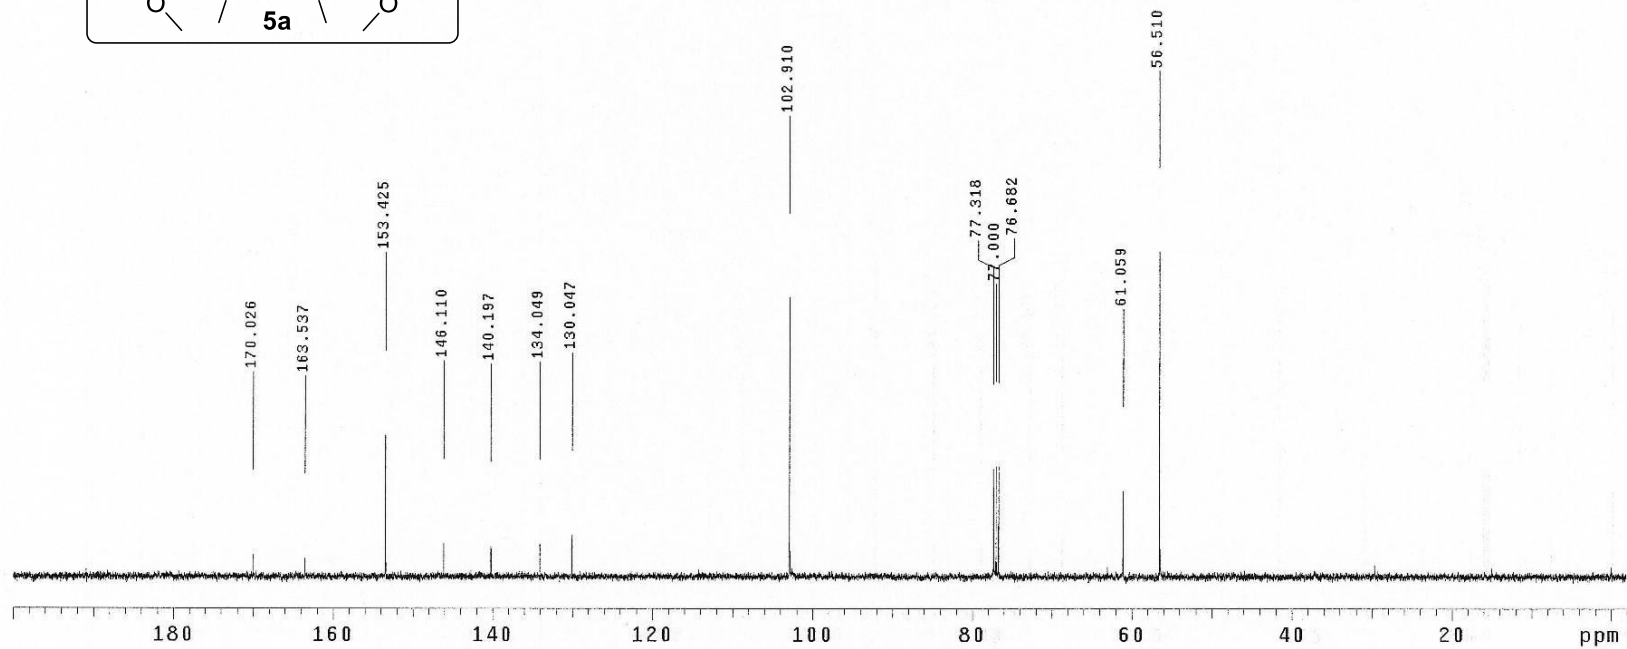

BN-4OMe

Pulse Sequence: s2pu1

Mercury-400BB "MercuryPlus400"

Date: Apr 28 2014

Solvent: CDCl<sub>3</sub>

Ambient temperature

Total 24 repetitions

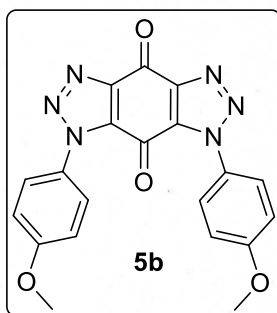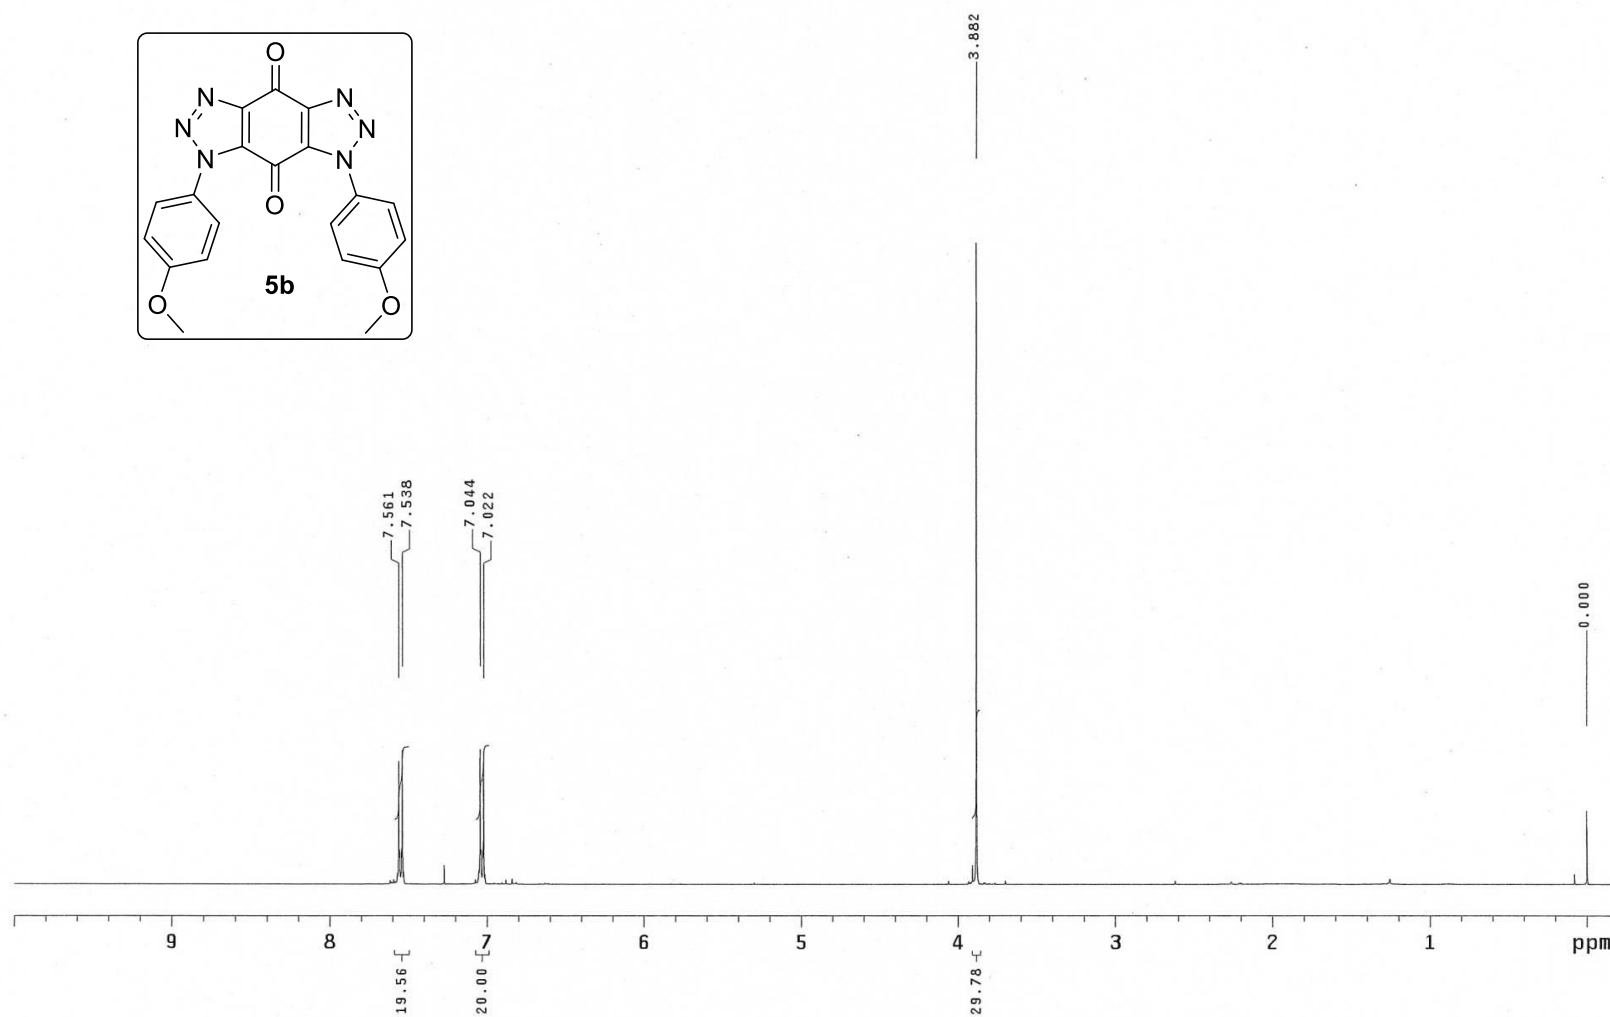

BN-4OMe

Pulse Sequence: s2pu1

Mercury-400BB "MercuryPlus400"

Date: Apr 28 2014

Solvent: CDCl<sub>3</sub>

Ambient temperature

Total 1296 repetitions

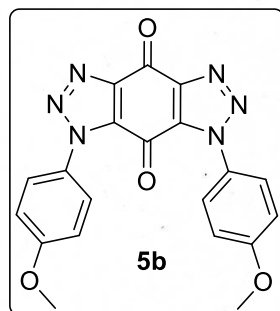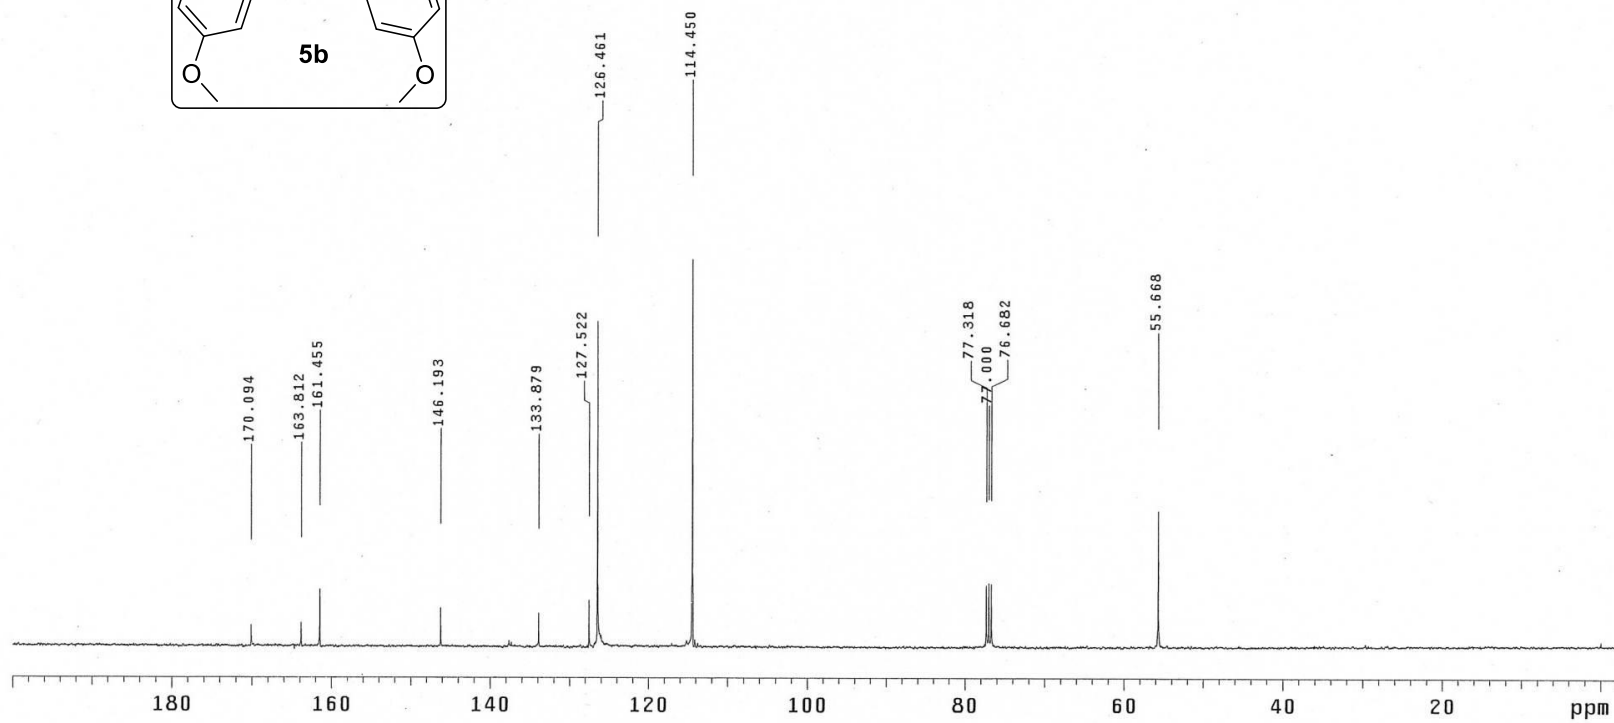

BN-2.4Me

Pulse Sequence: s2pu1

Mercury-400BB "MercuryPlus400"

Date: Aug 26 2014

Solvent: CDCl<sub>3</sub>

Ambient temperature

Total 32 repetitions

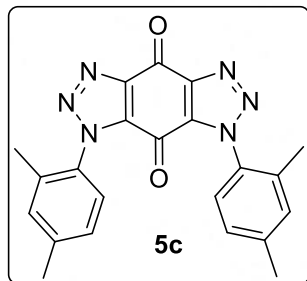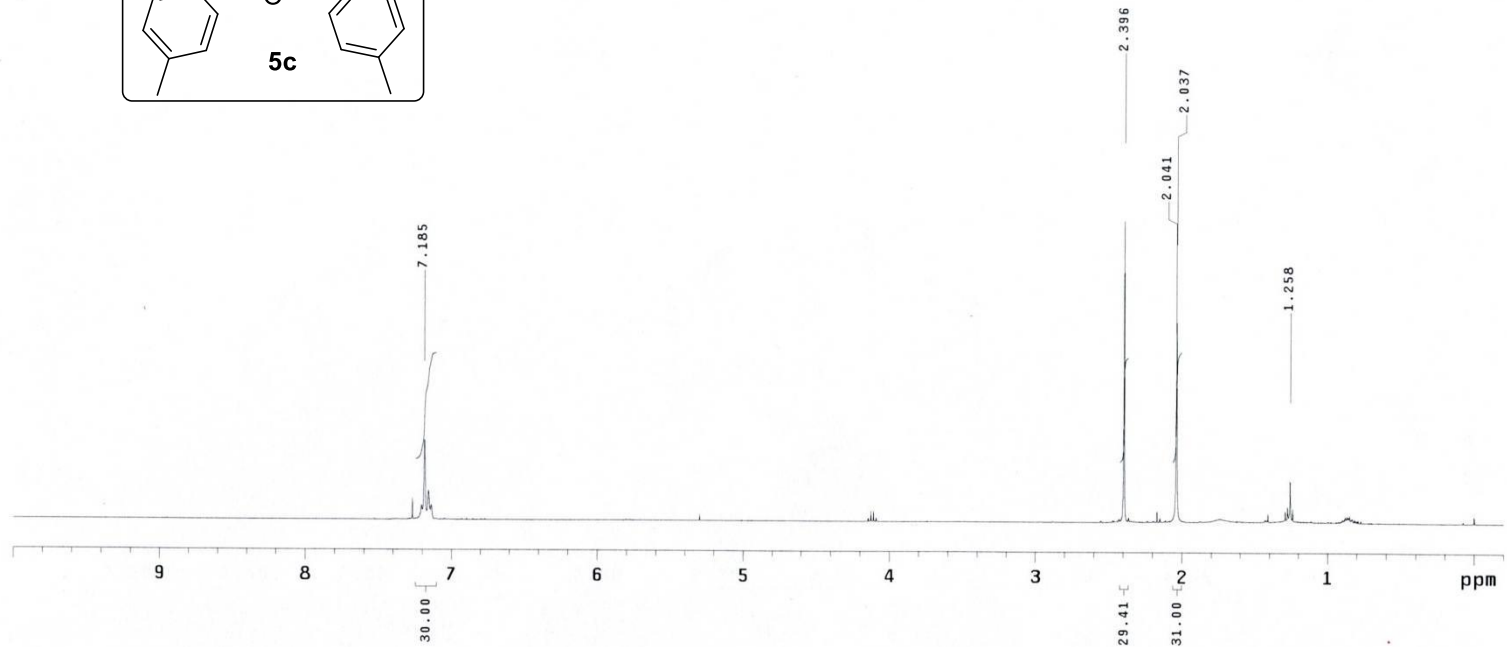

BN-2.4Me

Pulse Sequence: s2pu1

Mercury-400BB "MercuryPlus400"

Date: Aug 26 2014

Solvent: CDCl<sub>3</sub>

Ambient temperature

Total 320 repetitions

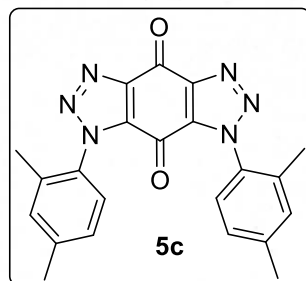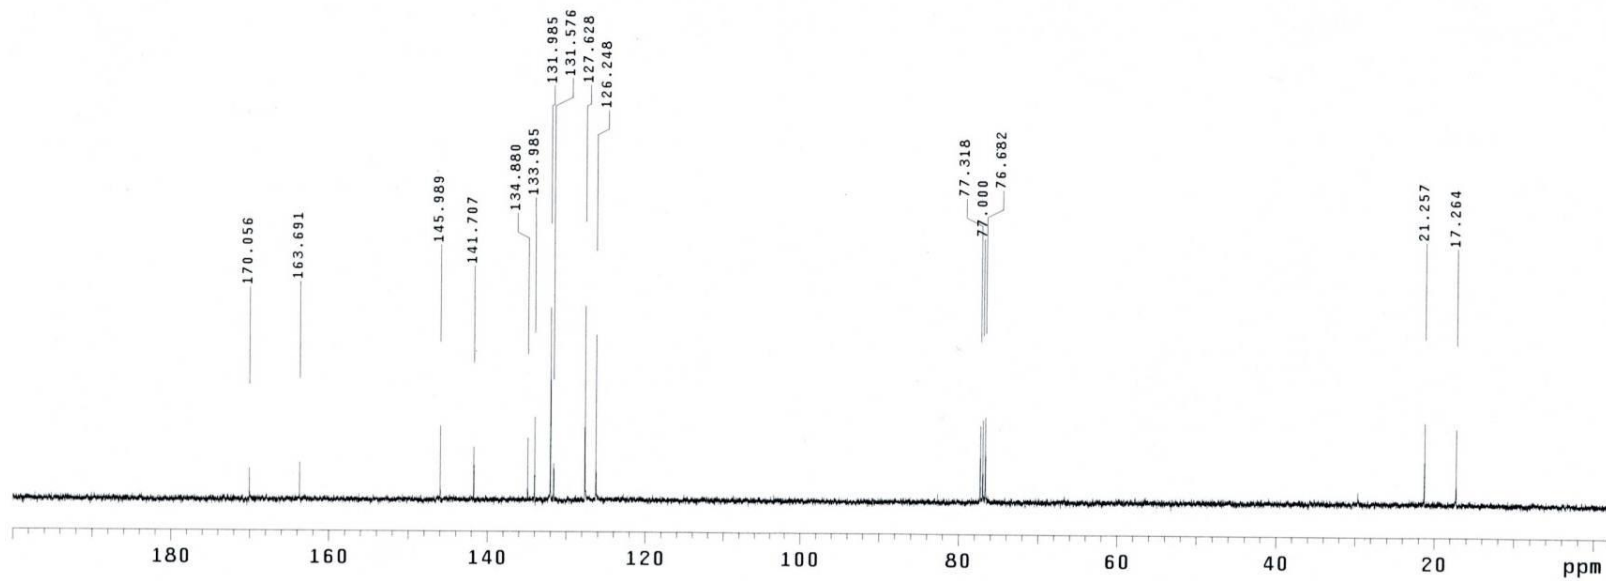

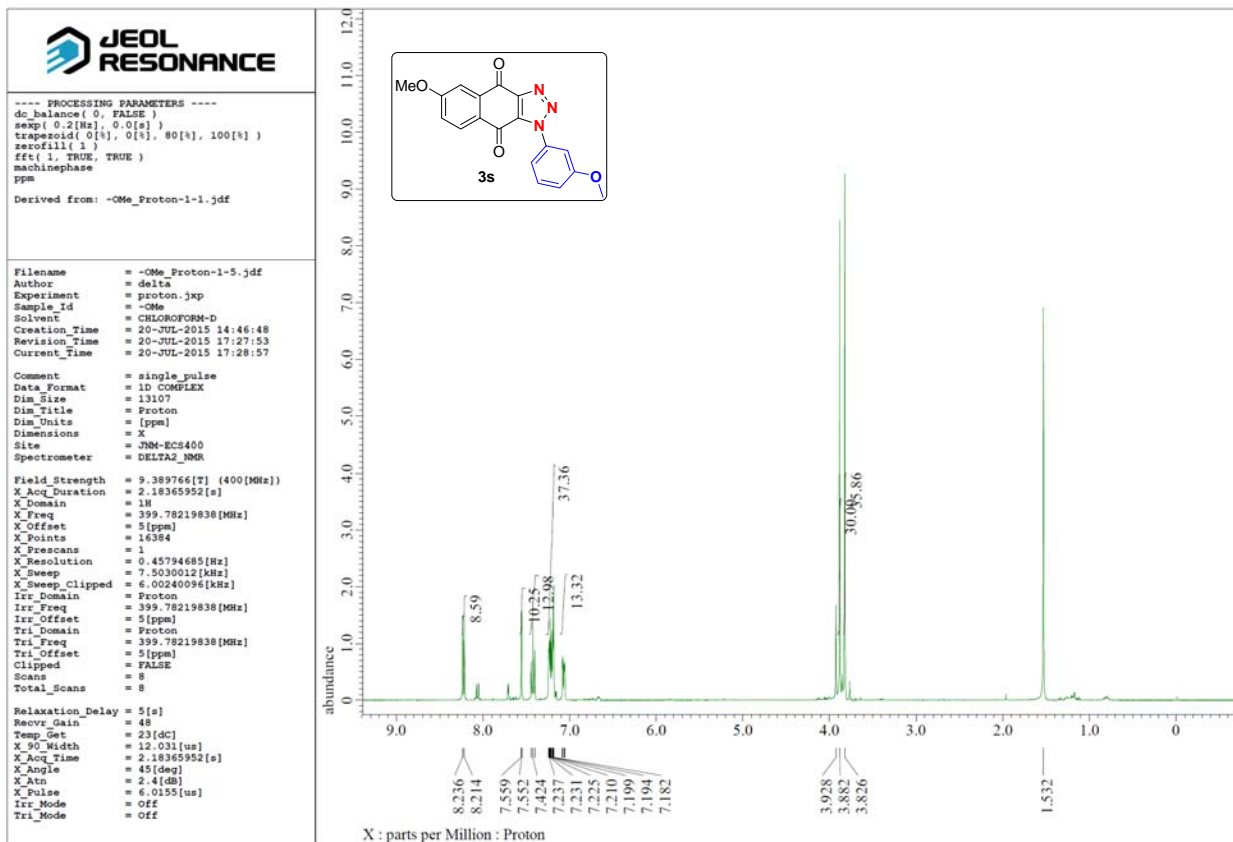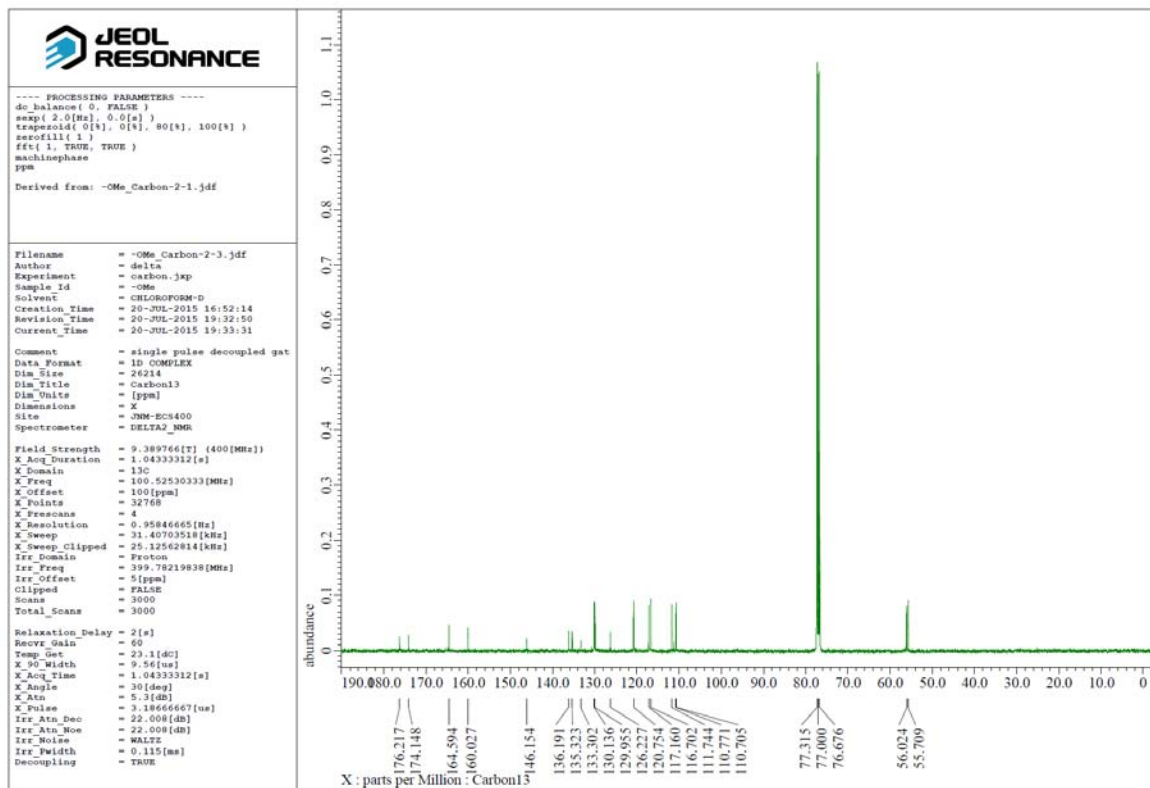

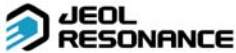

----- PROCESSING PARAMETERS -----

```
de_balance( 0, FALSE )
sext( 0.2[Hz], 0.0[s] )
trapezoid( 0[Hz], 0[Hz], 80[Hz], 100[Hz] )
zerofill( 1 )
fft( 1, TRUE, TRUE )
machinephase
ppm
```

Derived from: 3-NO2-triOMe\_Proton-1-1.jdf

Filename = 3-NO2-triOMe\_Proton-1-5.jd  
Author = delta  
Experiment = proton.jxp  
Sample\_id = 3-NO2-triOMe  
Solvent = CHLOROFORM-D  
Creation\_Time = 20-JUL-2015 12:52:58  
Revision\_Time = 20-JUL-2015 17:37:53  
Current\_Time = 20-JUL-2015 17:38:12

Comment = single\_pulse  
Data\_Format = 1D\_COMPLEX  
Dim\_Size = 13107  
Dim\_Title = Proton  
Dim\_Units = [ppm]  
Dimensions = 1  
Site = JNM-ECS400  
Spectrometer = DELTA2\_MGR

Field\_Strength = 9.389766[T] (400[MHz])  
X\_Acq\_Duration = 2.18365952[s]  
X\_Domain = 1H  
X\_Freq = 399.78219838[MHz]  
X\_Offset = 5[ppm]  
X\_Points = 16384  
X\_Prescans = 1  
X\_Resolution = 0.45794685[Hz]  
X\_Sweep = 7.5030012[kHz]  
X\_Sweep\_Clipped = 6.00240096[kHz]  
Irr\_Domain = Proton  
Irr\_Freq = 399.78219838[MHz]  
Irr\_Offset = 5[ppm]  
Tri\_Domain = Proton  
Tri\_Freq = 399.78219838[MHz]  
Tri\_Offset = 5[ppm]  
Clipped = FALSE  
Scans = 8  
Total\_Scans = 8

Relaxation\_Delay = 5[s]  
Recvr\_Gain = 42  
Temp\_Get = 23.1[degC]  
X\_90\_Width = 12.031[us]  
X\_Acq\_Time = 2.18365952[s]  
X\_Angle = 45[deg]  
X\_Atn = 2.4[deg]  
X\_Pulse = 6.0155[us]  
Irr\_Mode = Off  
Tri\_Mode = Off

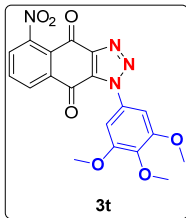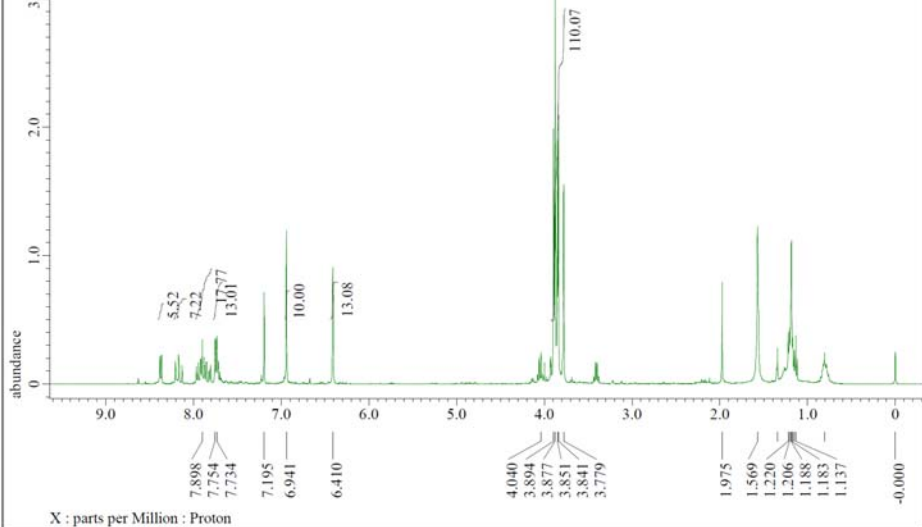

X : parts per Million : Proton
